# Supplementary material for: Neuroprotective constituents from the aerial parts of Cannabis sativa L. subsp. sativa
Source: PubMed Central journal article supplement — RSC Adv. 2020 Aug 28;10(53):32043–9. doi: 10.1039/d0ra04565a (PMC9056577; doi:10.1039/d0ra04565a), 2020-08-28
Supplement: RA-010-D0RA04565A-s001.pdf [file RA-010-D0RA04565A-s001.pdf]

## Supporting Information

### Neuroprotective constituents from the aerial parts of *Cannabis sativa*

#### *L. subsp. Sativa*

Jia Li<sup>a</sup>, Guan Wang<sup>a,b</sup>, Yu Qin<sup>a</sup>, Xue Zhang<sup>a</sup>, Hai-Feng Wang<sup>a</sup>, Hong-Wei Liu<sup>c</sup>, Ling-Juan Zhu<sup>\*,a</sup> and Xin-Sheng Yao<sup>\*,a</sup>

<sup>a</sup> College of Traditional Chinese Materia, Key Laboratory of Structure-Based Drug Design & Discovery of Ministry of Education, Shenyang Pharmaceutical University, Shenyang 110016, China.

<sup>b</sup> State Key Laboratory of Biotherapy and Cancer Center and Department of Gastrointestinal Surgery, West China Hospital, Sichuan University, and Collaborative Innovation Center for Biotherapy, Chengdu 610041, China.

<sup>c</sup> State Key Laboratory of Mycology, Institute of Microbiology, Chinese Academy of Sciences, Beijing 100101, China

## Contents:

|                                                                                                                                        |    |
|----------------------------------------------------------------------------------------------------------------------------------------|----|
| Figure S1. <sup>1</sup> H NMR spectrum of cannabistativas A (1) in CDCl <sub>3</sub> .....                                             | 1  |
| Figure S2. <sup>13</sup> C NMR and DEPT 135 spectra of cannabistativas A (1) in CDCl <sub>3</sub> . ....                               | 1  |
| Figure S3. <sup>1</sup> H- <sup>1</sup> H COSY spectrum of cannabistativas A (1) in CDCl <sub>3</sub> .....                            | 2  |
| Figure S4. HSQC spectrum of cannabistativas A (1) in CDCl <sub>3</sub> . ....                                                          | 2  |
| Figure S5. HMBC spectrum of cannabistativas A (1) in CDCl <sub>3</sub> . ....                                                          | 3  |
| Figure S6. ROESY spectrum of cannabistativas A (1) in CDCl <sub>3</sub> . ....                                                         | 3  |
| Figure S7. HRESIMS spectrum of cannabistativas A (1). ....                                                                             | 4  |
| Figure S8. UV spectrum of cannabistativas A (1). ....                                                                                  | 4  |
| Figure S9. <sup>1</sup> H NMR spectrum of cannabistativas B (2) in CDCl <sub>3</sub> .....                                             | 5  |
| Figure S10. <sup>13</sup> C NMR and DEPT 135 spectra of cannabistativas B (2) in CDCl <sub>3</sub> . ....                              | 5  |
| Figure S11. <sup>1</sup> H- <sup>1</sup> H COSY spectrum of cannabistativas B (2) in CDCl <sub>3</sub> .....                           | 6  |
| Figure S12. HSQC spectrum of cannabistativas B (2) in CDCl <sub>3</sub> . ....                                                         | 6  |
| Figure S13. HMBC spectrum of cannabistativas B (2) in CDCl <sub>3</sub> . ....                                                         | 7  |
| Figure S14. NOESY spectrum of cannabistativas B (2) in CDCl <sub>3</sub> .....                                                         | 7  |
| Figure S15. HRESIMS spectrum of cannabistativas B (2). ....                                                                            | 8  |
| Figure S16. UV spectrum of cannabistativas B (2). ....                                                                                 | 8  |
| Figure S17. <sup>1</sup> H NMR spectrum of cannabistativas C (3) in CDCl <sub>3</sub> .....                                            | 9  |
| Figure S18. <sup>13</sup> C NMR and DEPT 135 spectra of cannabistativas C (3) in CDCl <sub>3</sub> . ....                              | 9  |
| Figure S19. <sup>1</sup> H- <sup>1</sup> H COSY spectrum of cannabistativas C (3) in CDCl <sub>3</sub> .....                           | 10 |
| Figure S20. HSQC spectrum of cannabistativas C (3) in CDCl <sub>3</sub> . ....                                                         | 10 |
| Figure S21. HMBC spectrum of cannabistativas C (3) in CDCl <sub>3</sub> . ....                                                         | 11 |
| Figure S22. NOESY spectrum of cannabistativas C (3) in CDCl <sub>3</sub> .....                                                         | 11 |
| Figure S23. HRESIMS spectrum of cannabistativas C (3). ....                                                                            | 12 |
| Figure S24. UV spectrum of cannabistativas C (3). ....                                                                                 | 12 |
| Figure S25. <sup>1</sup> H NMR spectrum of (7Z, 9Z)-cannabiphenolic acid A (4) in CDCl <sub>3</sub> . ....                             | 13 |
| Figure S26. <sup>13</sup> C NMR and DEPT 135 spectra of (7Z, 9Z)-cannabiphenolic acid A (4) in CDCl <sub>3</sub> ...                   | 13 |
| Figure S27. <sup>1</sup> H- <sup>1</sup> H COSY spectrum of (7Z, 9Z)-cannabiphenolic acid A (4) in CDCl <sub>3</sub> . ....            | 14 |
| Figure S28. HSQC spectrum of (7Z, 9Z)-cannabiphenolic acid A (4) in CDCl <sub>3</sub> .....                                            | 14 |
| Figure S29. HMBC spectrum of (7Z, 9Z)-cannabiphenolic acid A (4) in CDCl <sub>3</sub> . ....                                           | 15 |
| Figure S30. NOE difference spectrum ( $\delta_{\text{H}}$ 4.40) of (7Z, 9Z)-cannabiphenolic acid A (4) in CDCl <sub>3</sub> .<br>..... | 15 |
| Figure S31. NOE difference spectrum ( $\delta_{\text{H}}$ 6.58) of (7Z, 9Z)-cannabiphenolic acid A (4) in CDCl <sub>3</sub> .<br>..... | 16 |
| Figure S32. HRESIMS spectrum of (7Z, 9Z)-cannabiphenolic acid A (4). ....                                                              | 16 |
| Figure S33. UV spectrum of (7Z, 9Z)-cannabiphenolic acid A (4). ....                                                                   | 17 |
| Figure S34. <sup>1</sup> H NMR spectrum of (8S, 9Z)-cannabiphenolic acid B (5) in CDCl <sub>3</sub> .....                              | 17 |
| Figure S35. <sup>13</sup> C NMR and DEPT 135 spectra of (8S, 9Z)-cannabiphenolic acid B (5) in CDCl <sub>3</sub> ...                   | 18 |
| Figure S36. <sup>1</sup> H- <sup>1</sup> H COSY spectrum of (8S, 9Z)-cannabiphenolic acid B (5) in CDCl <sub>3</sub> . ....            | 18 |
| Figure S37. HSQC spectrum of (8S, 9Z)-cannabiphenolic acid B (5) in CDCl <sub>3</sub> .....                                            | 19 |
| Figure S38. HMBC spectrum of (8S, 9Z)-cannabiphenolic acid B (5) in CDCl <sub>3</sub> . ....                                           | 19 |
| Figure S39. HRESIMS spectrum of (8S, 9Z)-cannabiphenolic acid B (5). ....                                                              | 20 |
| Figure S40. UV spectrum of (8S, 9Z)-cannabiphenolic acid B (5). ....                                                                   | 20 |

|                                                                                                                                                                               |    |
|-------------------------------------------------------------------------------------------------------------------------------------------------------------------------------|----|
| Figure S41. Results of DP4+ analysis of (7Z, 9Z)-cannabiphenolic acid A ( <b>4</b> ). .....                                                                                   | 21 |
| Figure S42. <sup>1</sup> H-NMR spectrum of ( <i>R</i> )-AT Ester of (8 <i>S</i> , 9 <i>Z</i> )-cannabiphenolic acid B ( <b>5</b> ) in pyridine- <i>d</i> <sub>5</sub> . ..... | 22 |
| Figure S43. <sup>1</sup> H-NMR spectrum of ( <i>S</i> )-AT Ester of (8 <i>S</i> , 9 <i>Z</i> )-cannabiphenolic acid B ( <b>5</b> ) in pyridine- <i>d</i> <sub>5</sub> . ..... | 22 |
| Table S1. Effects of compounds <b>1-5</b> , <b>7</b> , <b>8</b> and <b>12-16</b> against H <sub>2</sub> O <sub>2</sub> -induced cytotoxicity in PC 12 cells .....             | 23 |

CS-EC-2411 H

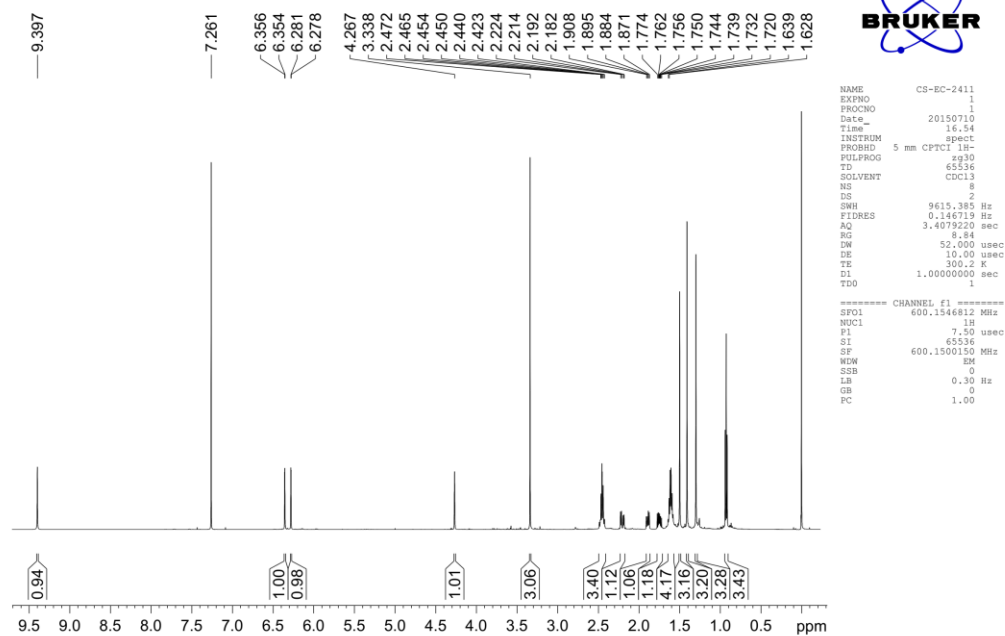

Figure S1. <sup>1</sup>H NMR spectrum of cannabisativas A (**1**) in CDCl<sub>3</sub>.

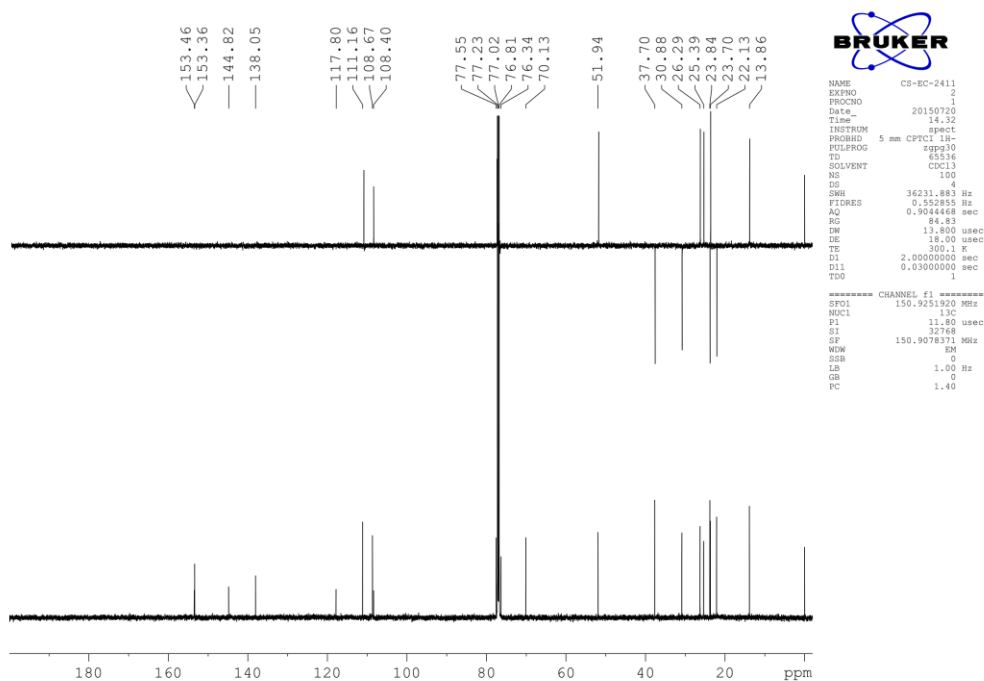

Figure S2. <sup>13</sup>C NMR and DEPT 135 spectra of cannabisativas A (**1**) in CDCl<sub>3</sub>.

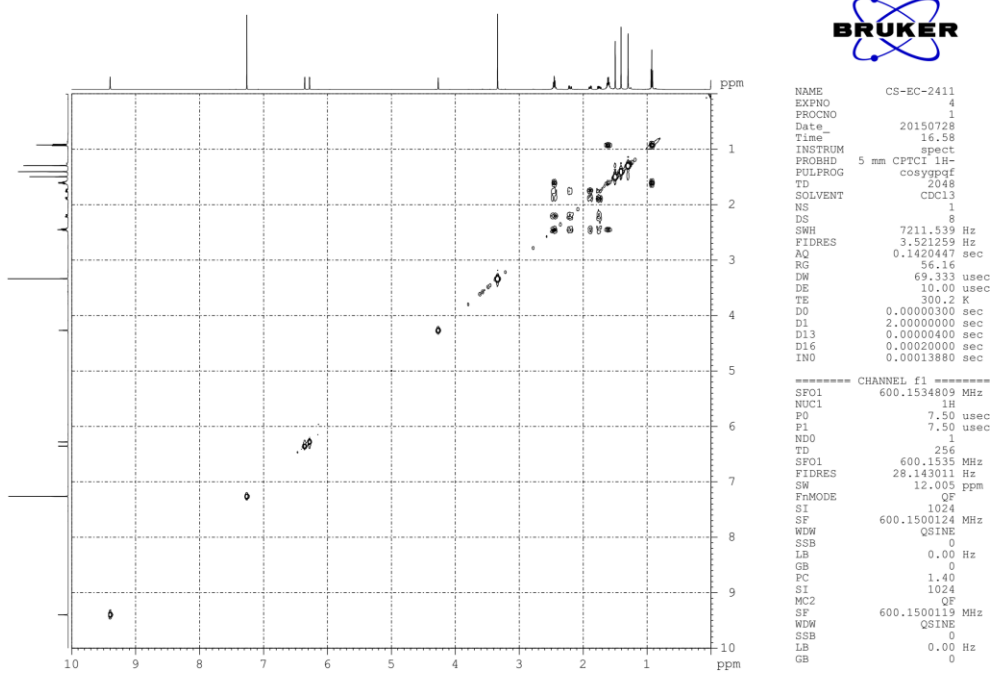

Figure S3.  $^1\text{H}$ - $^1\text{H}$  COSY spectrum of cannabisativas A (**1**) in  $\text{CDCl}_3$ .

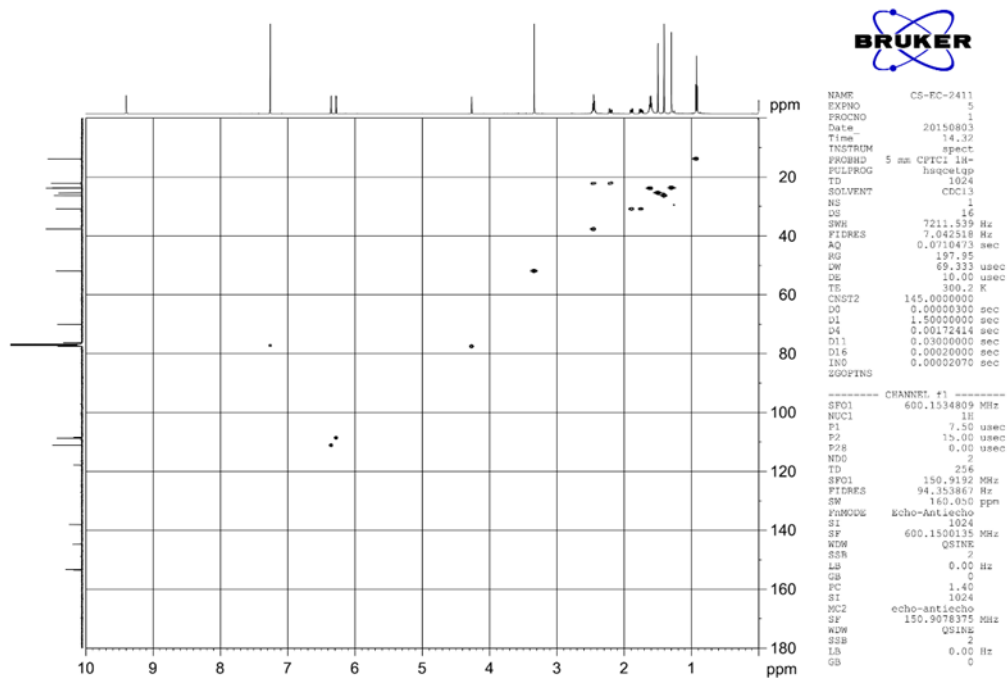

Figure S4. HSQC spectrum of cannabisativas A (**1**) in  $\text{CDCl}_3$ .

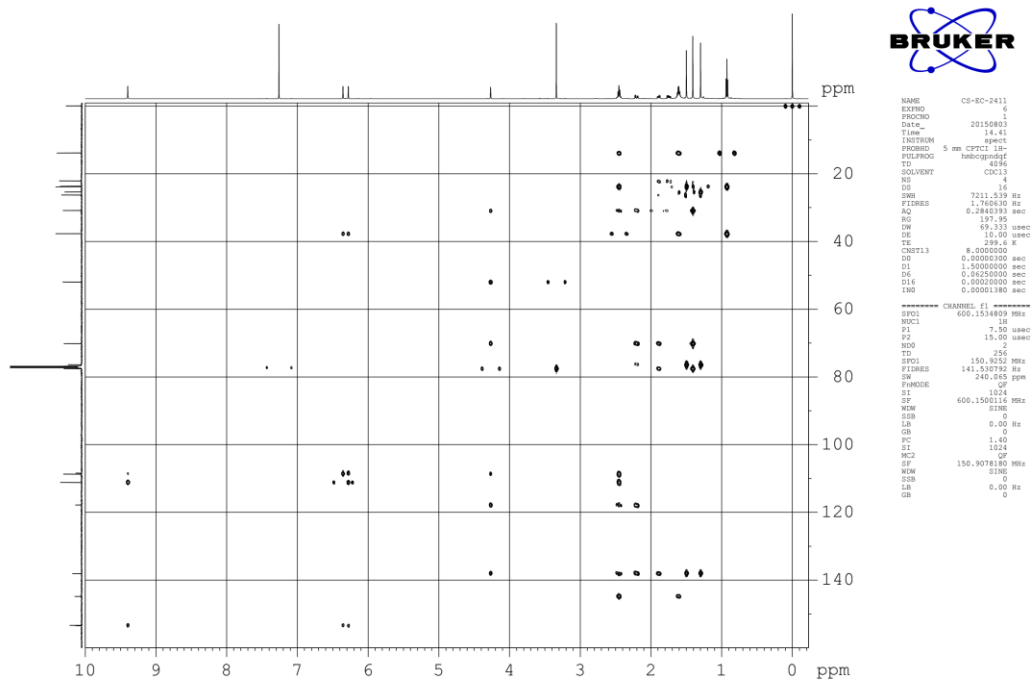

Figure S5. HMBC spectrum of cannabisativas A (1) in CDCl<sub>3</sub>.

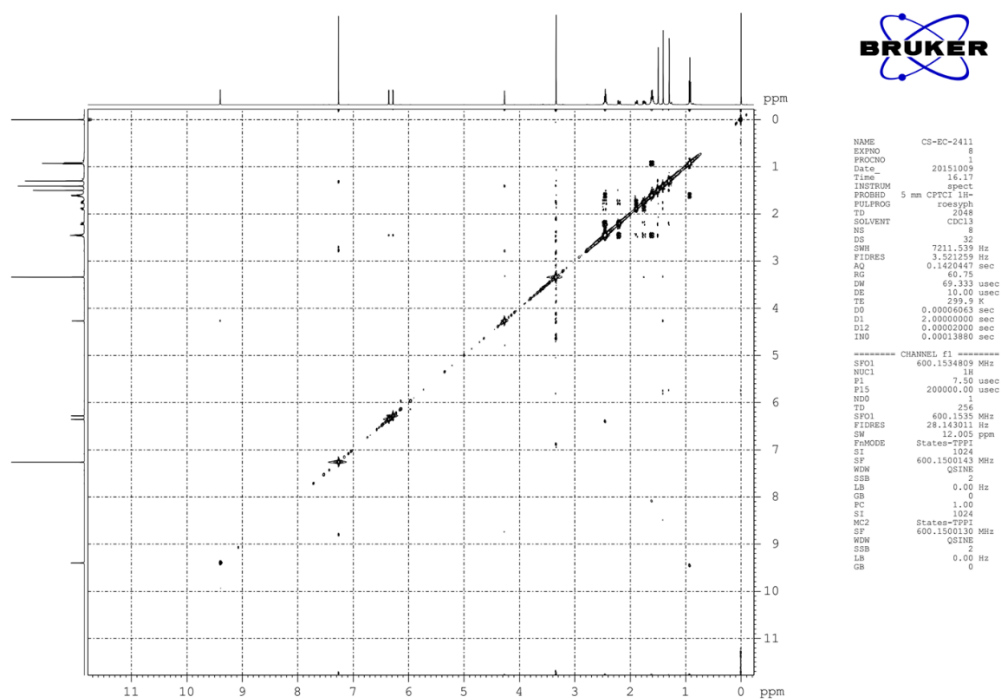

Figure S6. ROESY spectrum of cannabisativas A (1) in CDCl<sub>3</sub>.

Single Mass Analysis

Tolerance = 5.0 mDa / DBE: min = -1.5, max = 50.0

Element prediction: Off

Number of isotope peaks used for i-FIT = 3

Monoisotopic Mass, Even Electron Ions

40 formula(e) evaluated with 1 results within limits (up to 50 closest results for each mass)

Elements Used:

C: 20-20 H: 0-900 O: 0-80 23Na: 0-1

1

20170410-78 218 (1.765)

1: TOF MS ES+  
1.00e+005

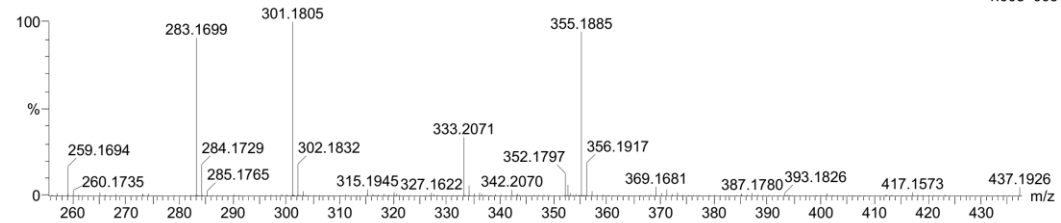

Minimum: -1.5  
Maximum: 5.0 10.0 50.0

| Mass     | Calc. Mass | mDa | PPM | DBE | i-FIT | Norm | Conf(%) | Formula    |
|----------|------------|-----|-----|-----|-------|------|---------|------------|
| 333.2071 | 333.2066   | 0.5 | 1.5 | 6.5 | 137.8 | n/a  | n/a     | C20 H29 O4 |

Figure S7. HRESIMS spectrum of cannabisativas A (1).

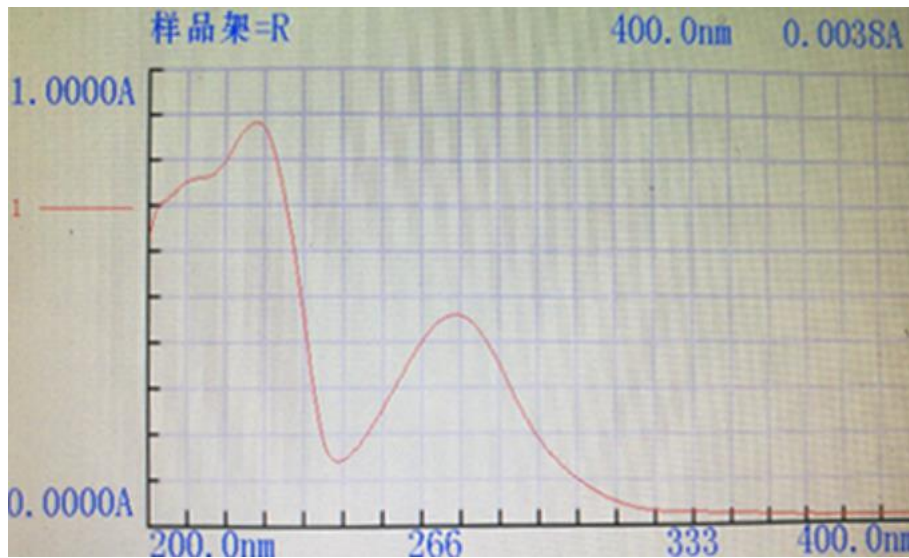

Figure S8. UV spectrum of cannabisativas A (1).

CS-EC-242 1H

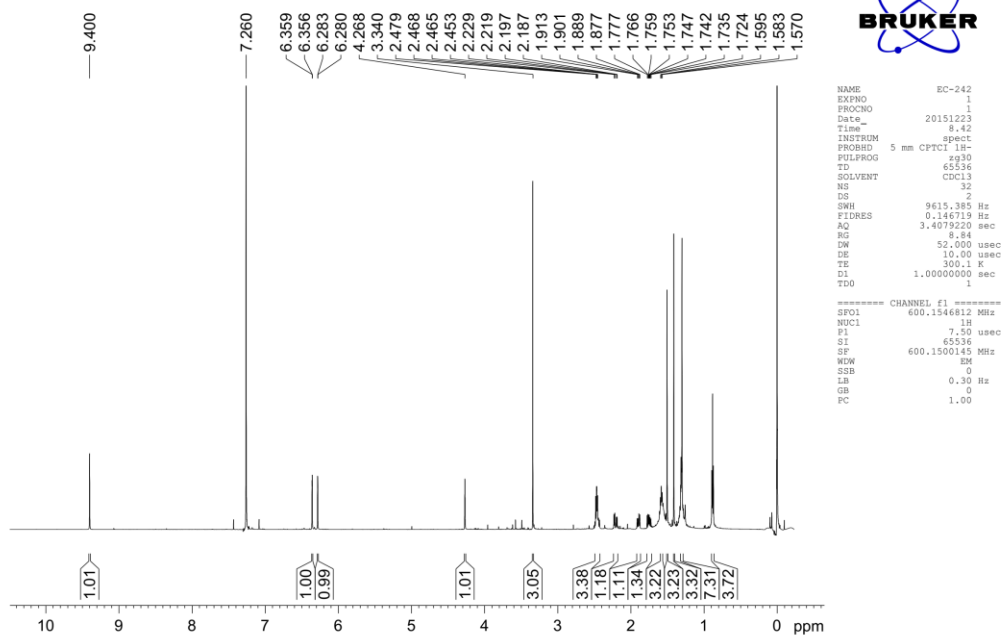

Figure S9. <sup>1</sup>H NMR spectrum of cannabisativas B (2) in CDCl<sub>3</sub>.

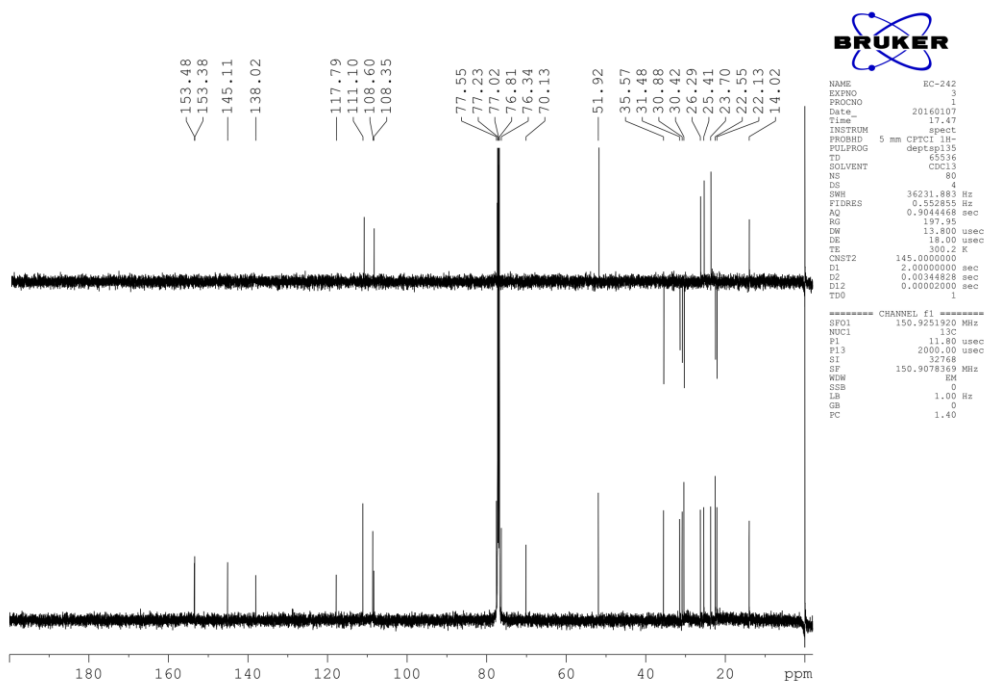

Figure S10. <sup>13</sup>C NMR and DEPT 135 spectra of cannabisativas B (2) in CDCl<sub>3</sub>.



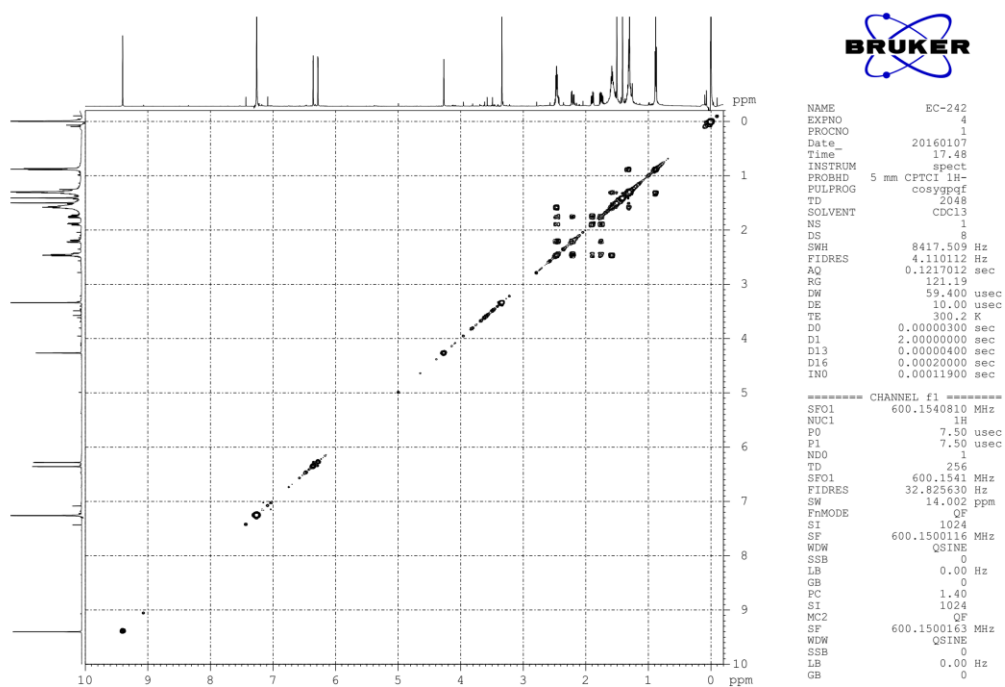

Figure S11.  $^1\text{H}$ - $^1\text{H}$  COSY spectrum of cannabisativas B (2) in  $\text{CDCl}_3$ .

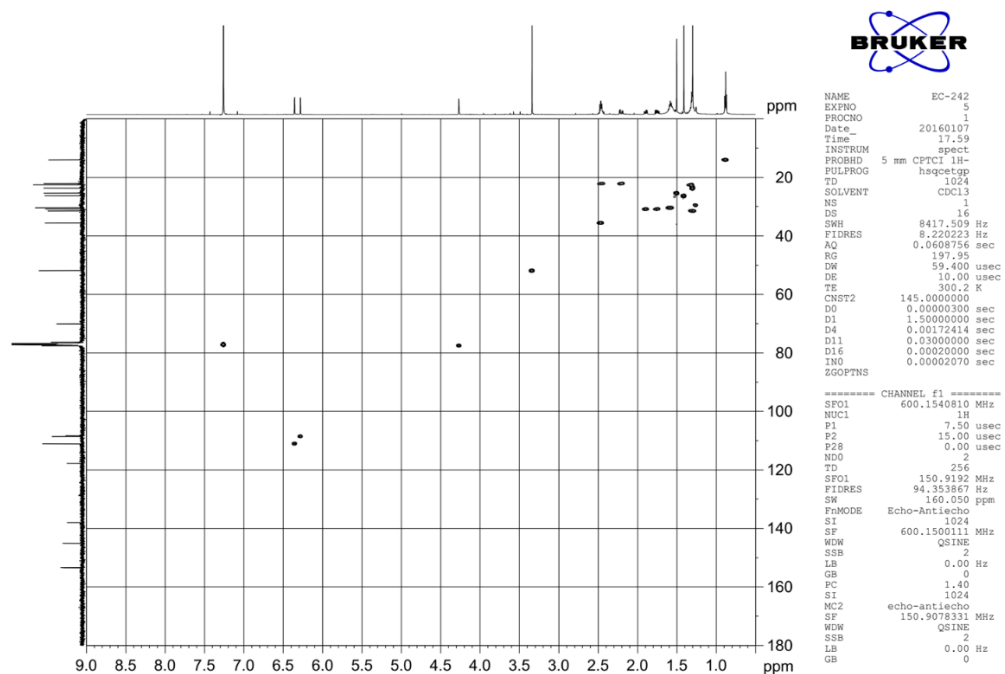

Figure S12. HSQC spectrum of cannabisativas B (2) in  $\text{CDCl}_3$ .

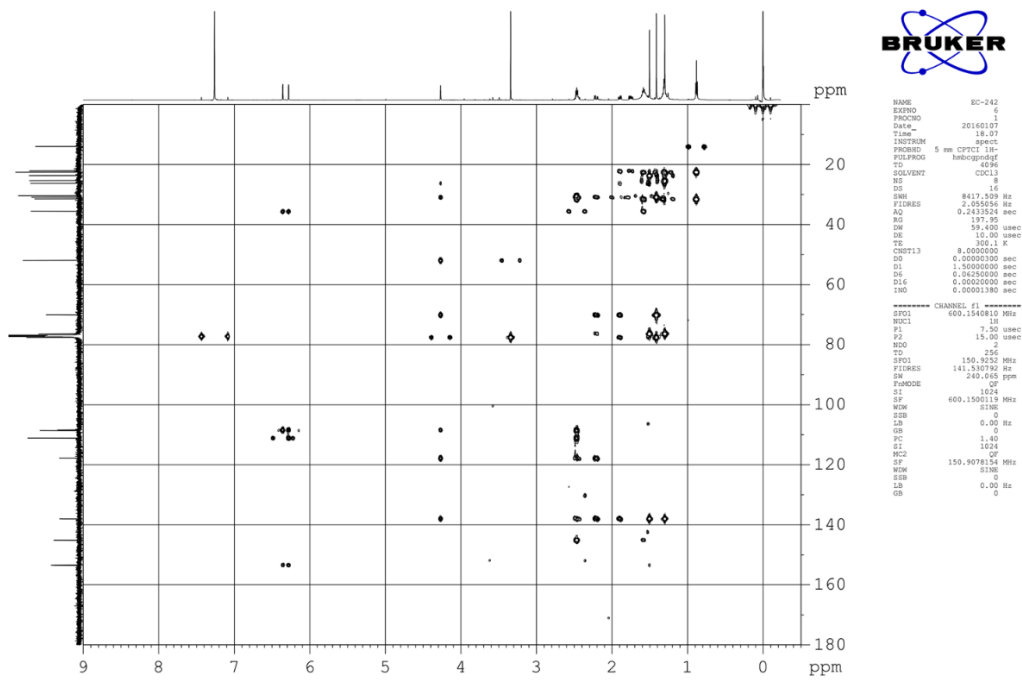

Figure S13. HMBC spectrum of cannabisativas B (2) in CDCl<sub>3</sub>.

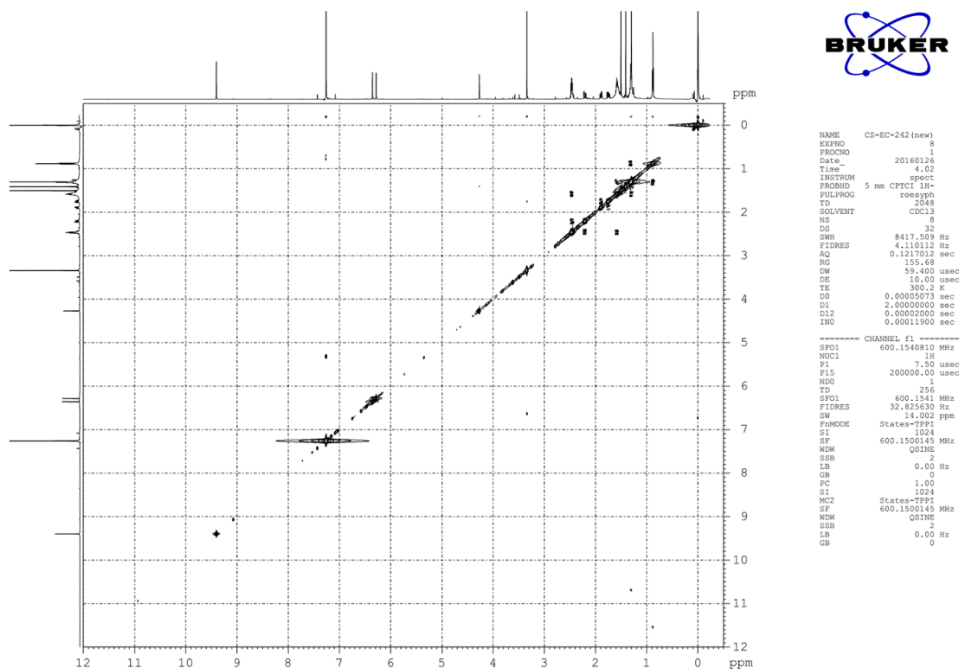

Figure S14. NOESY spectrum of cannabisativas B (2) in CDCl<sub>3</sub>.

Single Mass Analysis

Tolerance = 5.0 mDa / DBE: min = -1.5, max = 50.0

Element prediction: Off

Number of isotope peaks used for i-FIT = 3

Monoisotopic Mass, Even Electron Ions

76 formula(e) evaluated with 1 results within limits (up to 50 closest results for each mass)

Elements Used:

C: 22-30 H: 0-900 O: 0-80 23Na: 0-1

2

20170410-79 247 (1.993)

1: TOF MS ES+  
5.86e+004

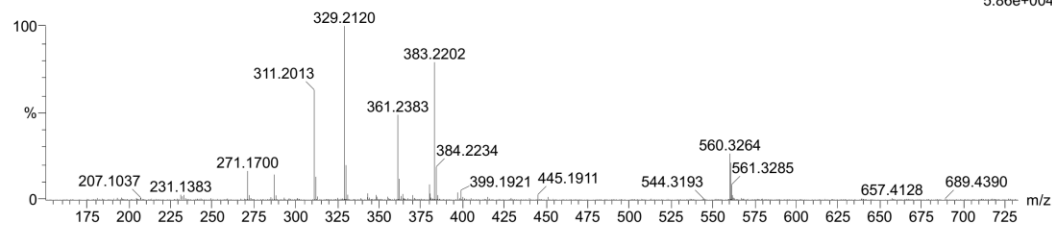

Minimum: -1.5  
Maximum: 5.0 10.0 50.0

| Mass     | Calc. Mass | mDa | PPM | DBE | i-FIT | Norm | Conf(%) | Formula    |
|----------|------------|-----|-----|-----|-------|------|---------|------------|
| 361.2383 | 361.2379   | 0.4 | 1.1 | 6.5 | 135.4 | n/a  | n/a     | C22 H33 O4 |

Figure S15. HRESIMS spectrum of cannabisativas B (2).

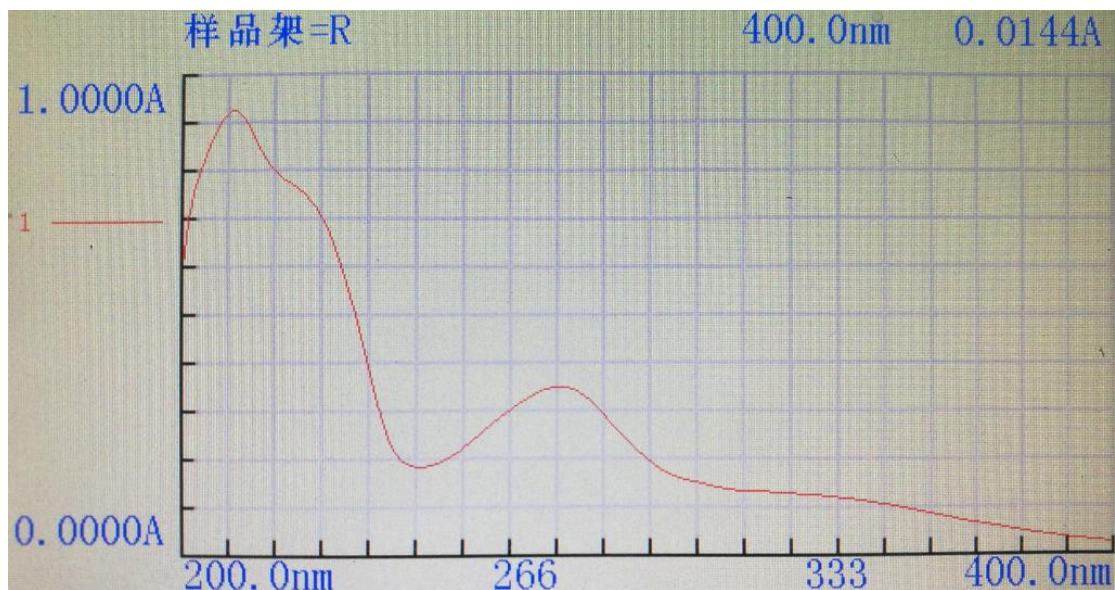

Figure S16. UV spectrum of cannabisativas B (2).

CS-EC-412 1H

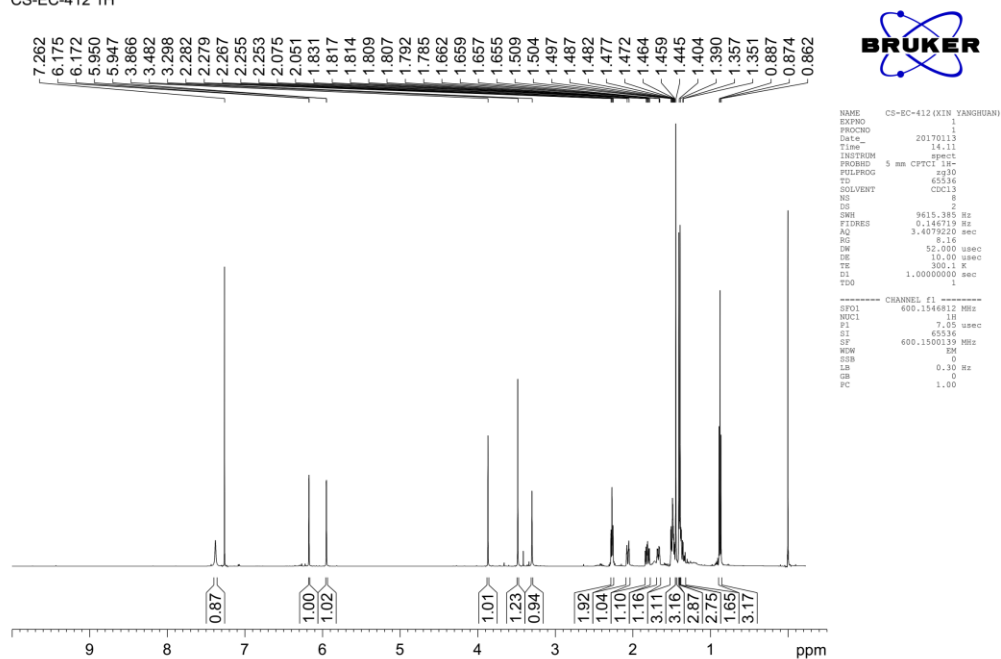

Figure S17. <sup>1</sup>H NMR spectrum of cannabistativas C (**3**) in CDCl<sub>3</sub>.

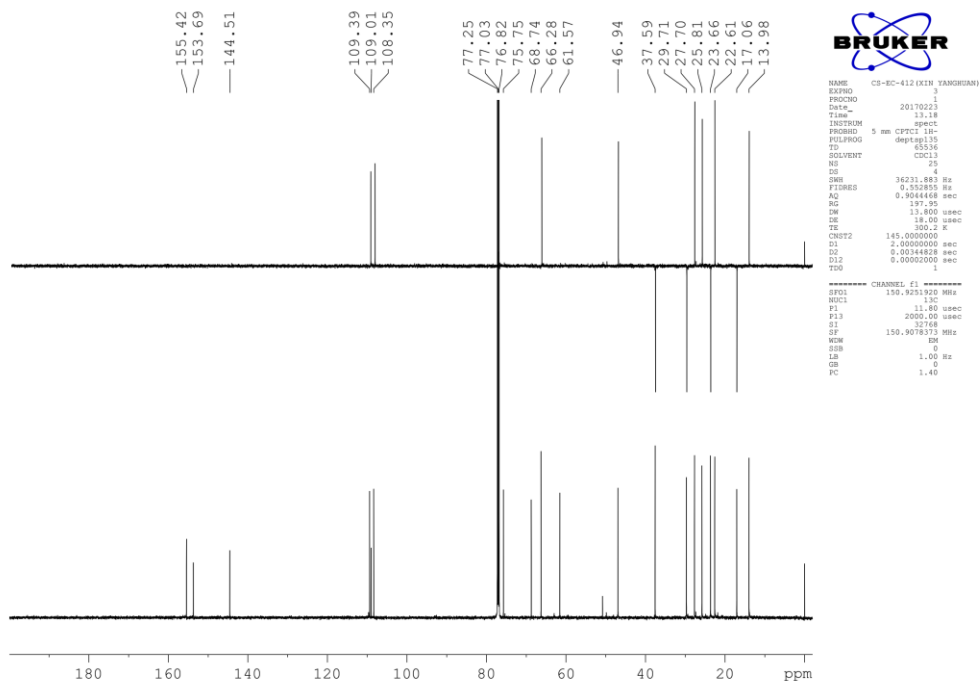

Figure S18. <sup>13</sup>C NMR and DEPT 135 spectra of cannabistativas C (**3**) in CDCl<sub>3</sub>.

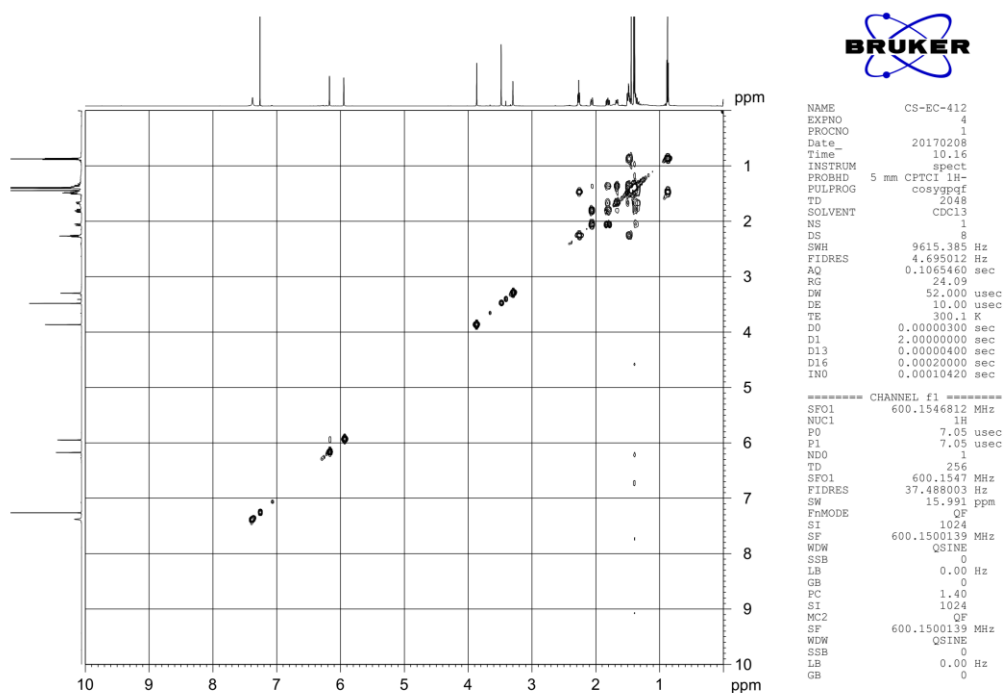

Figure S19.  $^1\text{H}$ - $^1\text{H}$  COSY spectrum of cannabisativas C (**3**) in  $\text{CDCl}_3$ .

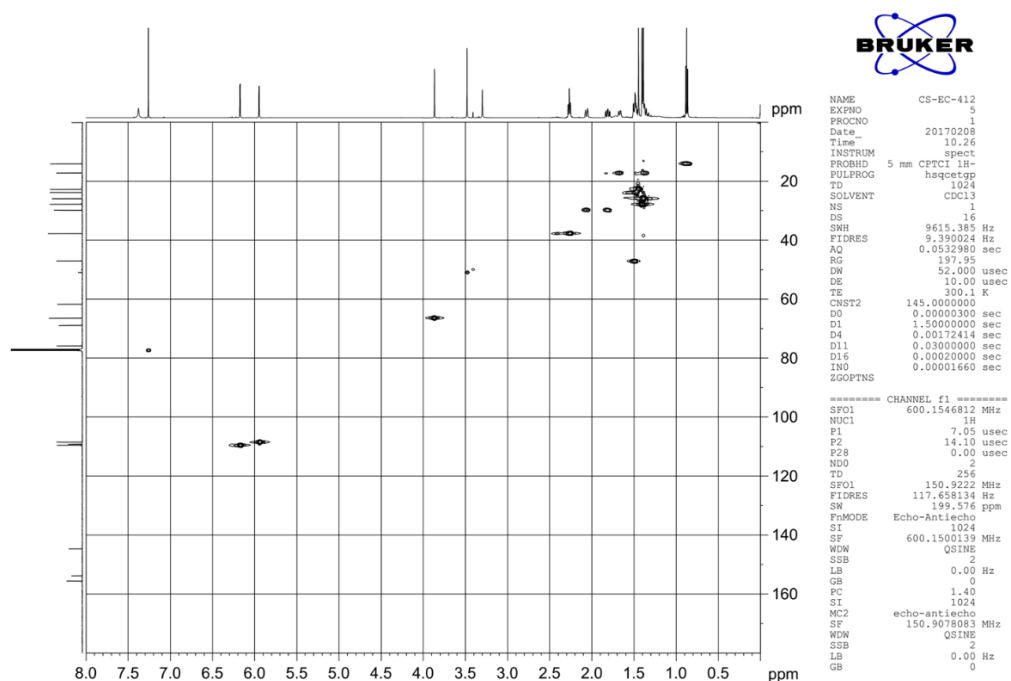

Figure S20. HSQC spectrum of cannabisativas C (**3**) in  $\text{CDCl}_3$ .

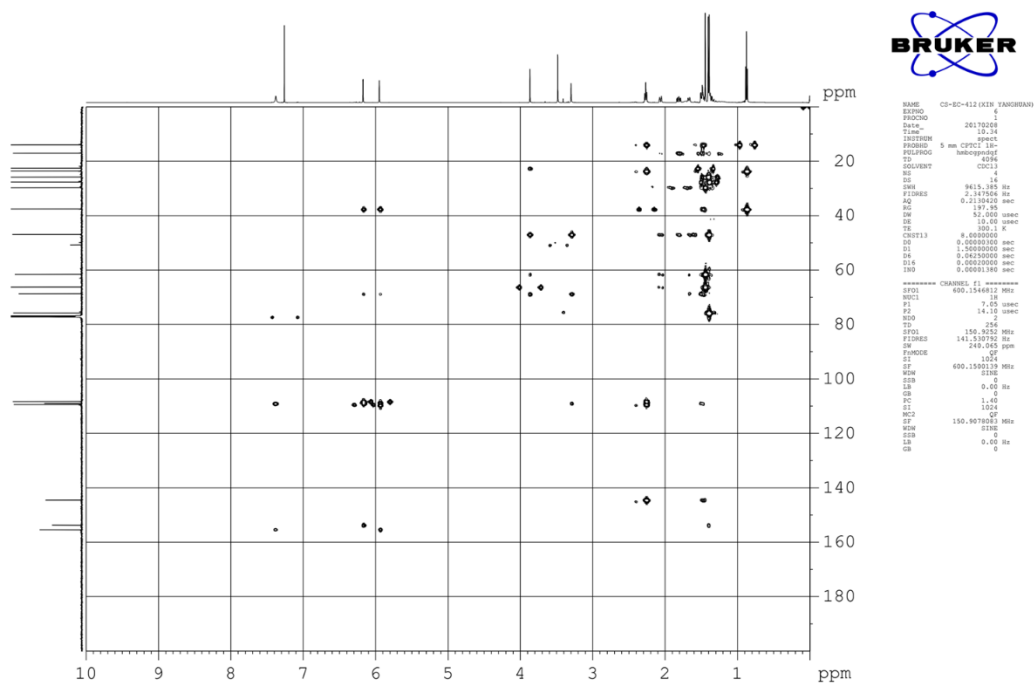

Figure S21. HMBC spectrum of cannabisativas C (3) in CDCl<sub>3</sub>.

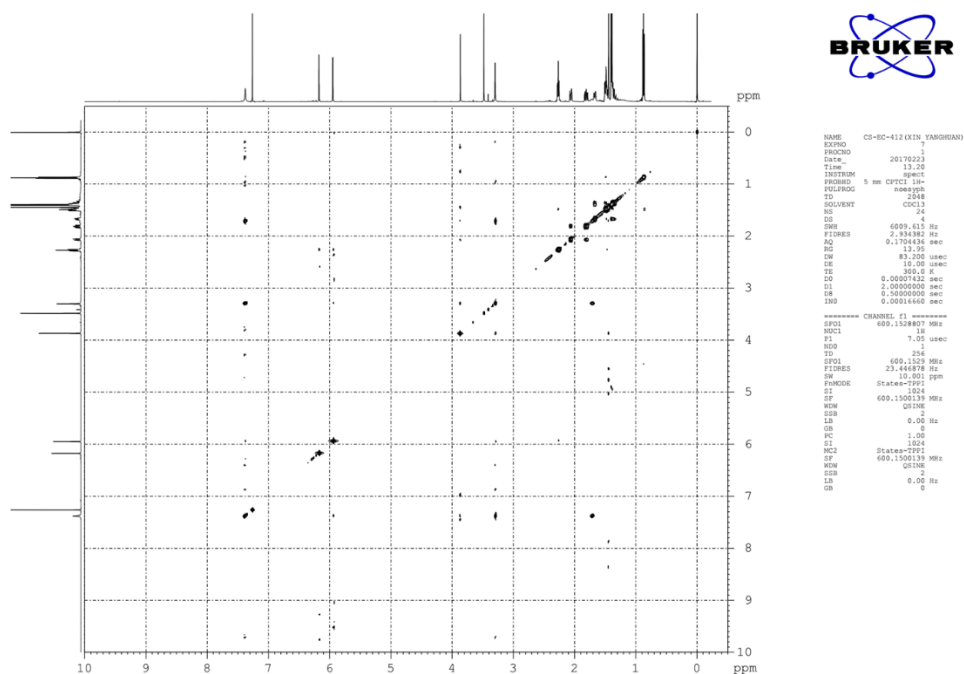

Figure S22. NOESY spectrum of cannabisativas C (3) in CDCl<sub>3</sub>.

Single Mass Analysis

Tolerance = 5.0 PPM / DBE: min = -1.5, max = 50.0

Element prediction: Off

Number of isotope peaks used for i-FIT = 3

Monoisotopic Mass, Even Electron Ions

72 formula(e) evaluated with 1 results within limits (up to 50 closest results for each mass)

Elements Used:

C: 19-19 H: 0-199 N: 0-1 O: 0-50 S: 0-1

CS-EC-412

2017050393 212 (1.709)

1: TOF MS ES-  
2.92e+005

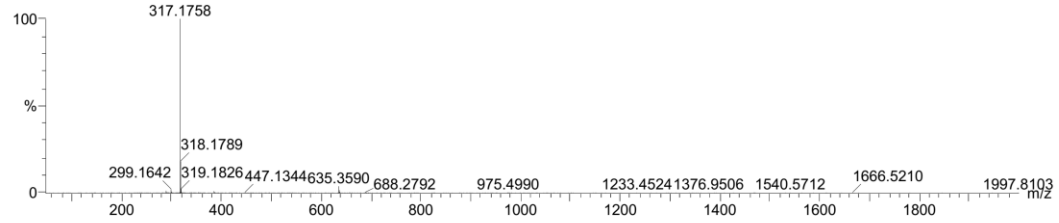

Minimum: -1.5  
Maximum: 50.0

| Mass     | Calc. Mass | mDa | PPM | DBE | i-FIT | Norm | Conf (%) | Formula    |
|----------|------------|-----|-----|-----|-------|------|----------|------------|
| 317.1758 | 317.1753   | 0.5 | 1.6 | 7.5 | 290.3 | n/a  | n/a      | C19 H25 O4 |

Figure S23. HRESIMS spectrum of cannabisativas C (3).

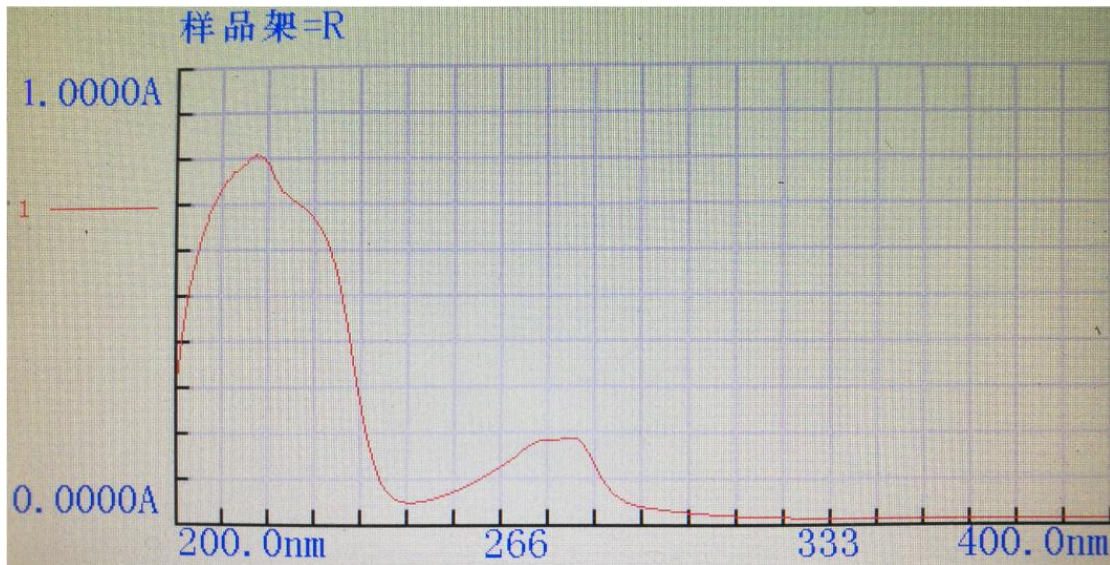

Figure S24. UV spectrum of cannabisativas C (3).



CS-EI-2353 1H

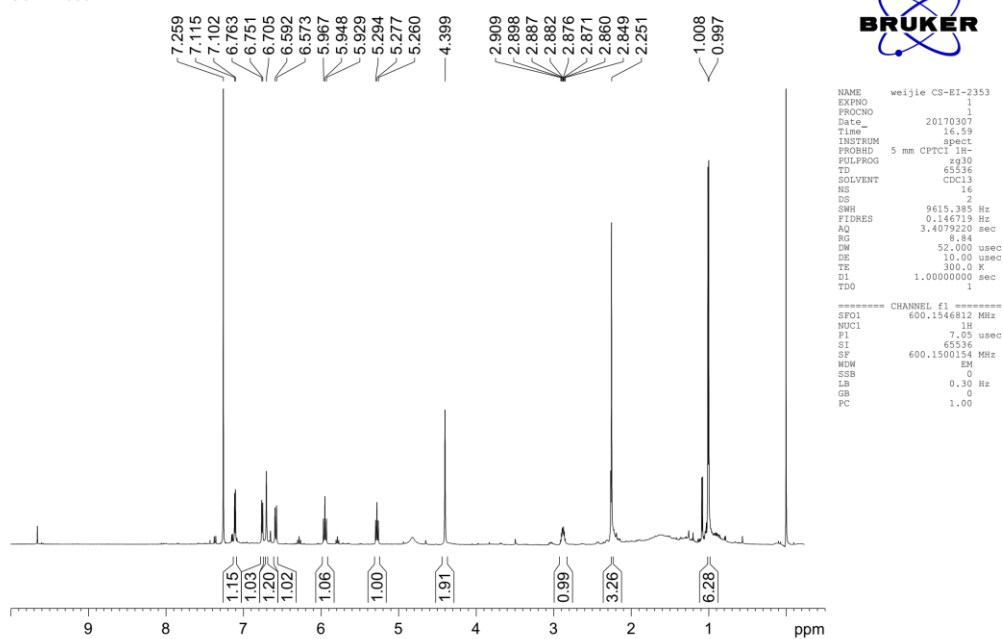

Figure S25. <sup>1</sup>H NMR spectrum of (7Z, 9Z)-cannabiphenolic acid A (4) in CDCl<sub>3</sub>.

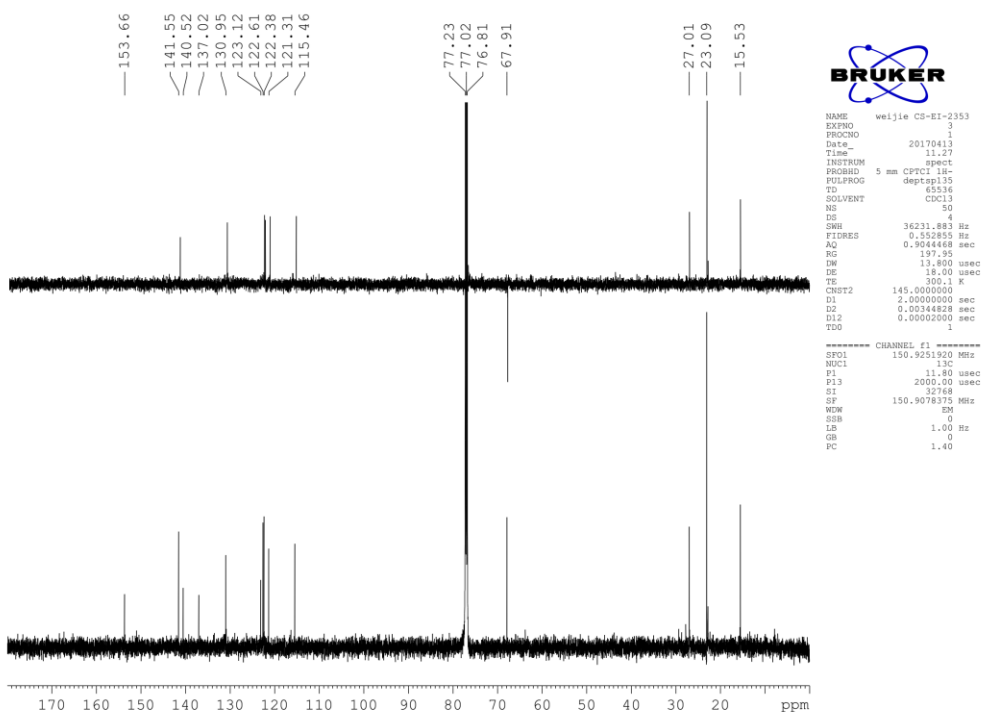

Figure S26. <sup>13</sup>C NMR and DEPT 135 spectra of (7Z, 9Z)-cannabiphenolic acid A (4) in CDCl<sub>3</sub>.



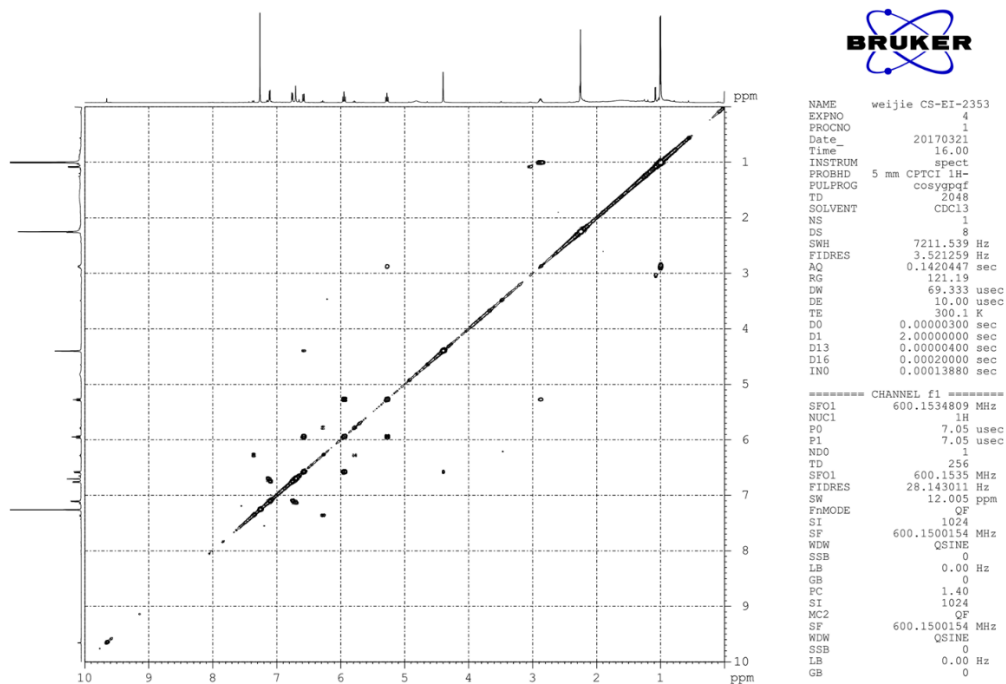

Figure S27.  $^1\text{H}$ - $^1\text{H}$  COSY spectrum of (7Z, 9Z)-cannabiphenolic acid A (**4**) in  $\text{CDCl}_3$ .

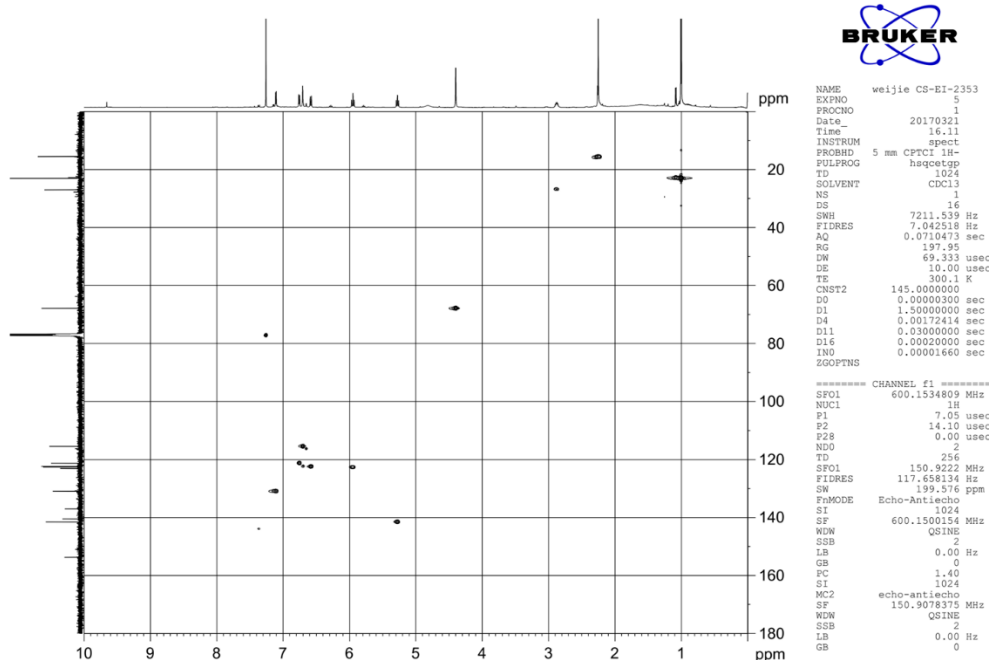

Figure S28. HSQC spectrum of (7Z, 9Z)-cannabiphenolic acid A (**4**) in  $\text{CDCl}_3$ .

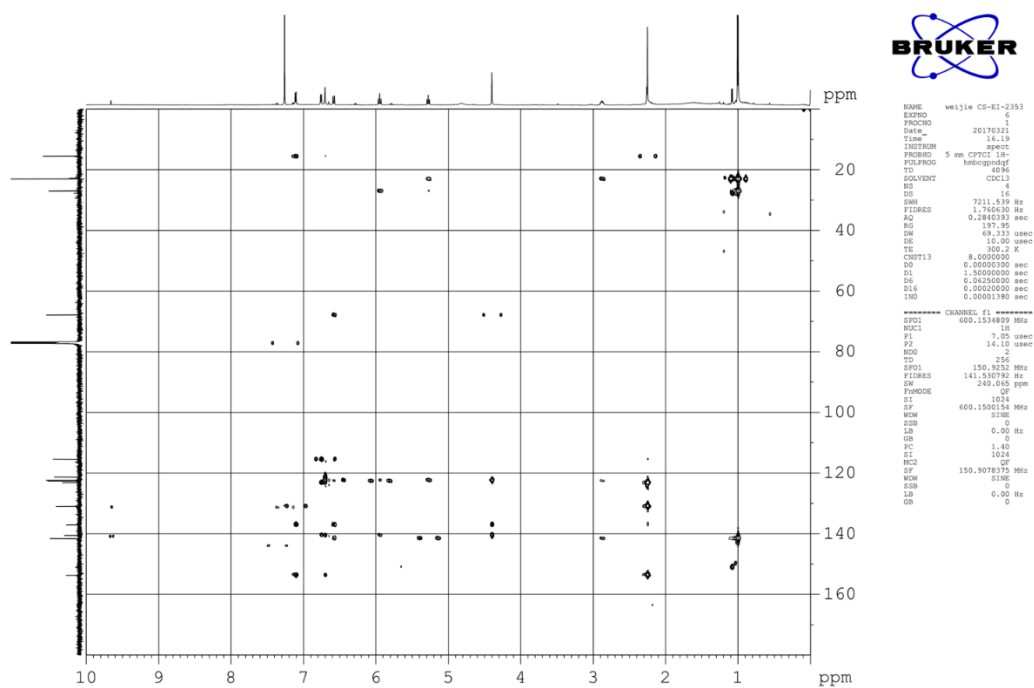

Figure S29. HMBC spectrum of (7Z, 9Z)-cannabiphenolic acid A (**4**) in CDCl<sub>3</sub>.

CS-EI-2353 NOE

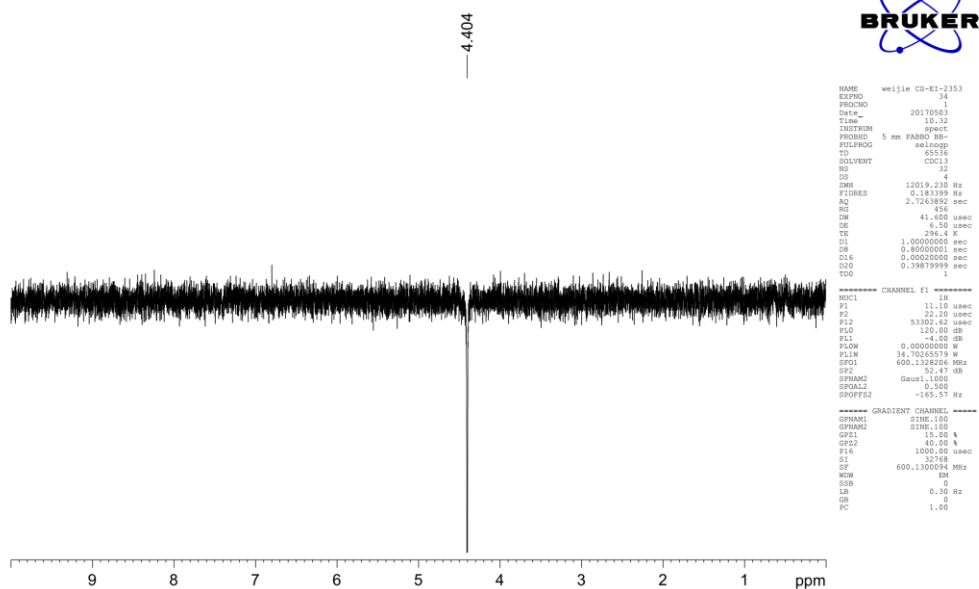

Figure S30. NOE difference spectrum ( $\delta_H$  4.40) of (7Z, 9Z)-cannabiphenolic acid A (**4**) in CDCl<sub>3</sub>.

CS-EI-2353 NOE

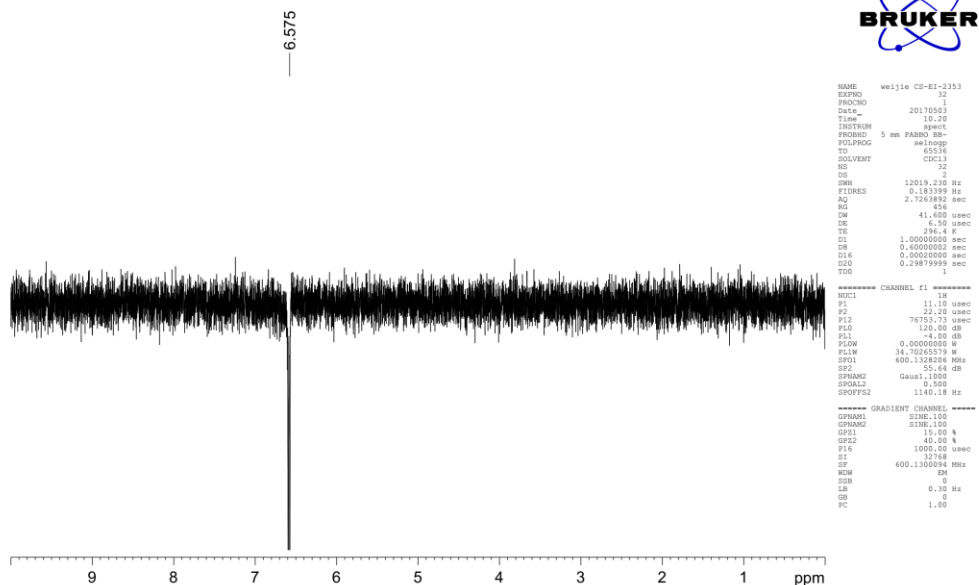

Figure S31. NOE difference spectrum ( $\delta_H$  6.58) of (7Z, 9Z)-cannabiphenolic acid A (4) in  $CDCl_3$ .

### Elemental Composition Report

Page 1

#### Single Mass Analysis

Tolerance = 5.0 PPM / DBE: min = -1.5, max = 50.0

Element prediction: Off

Number of isotope peaks used for i-FIT = 3

Monoisotopic Mass, Even Electron Ions

54 formula(e) evaluated with 1 results within limits (up to 50 closest results for each mass)

Elements Used:

C: 15-15 H: 0-199 N: 0-1 O: 0-50 S: 0-1

CS-EI-2353

2017050346 195 (1.582)

1: TOF MS ES-  
2.27e+005

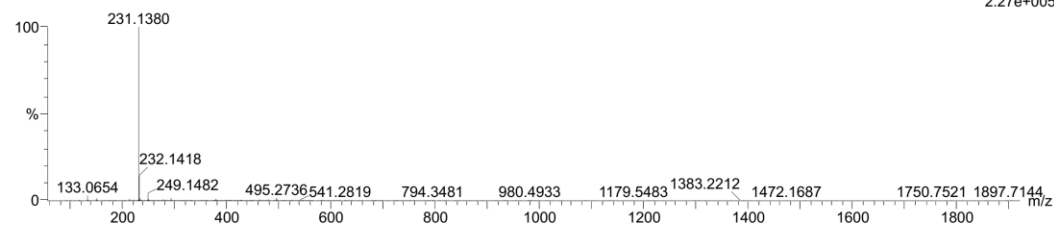

Minimum: -1.5  
Maximum: 20.0 5.0 50.0

| Mass     | Calc. Mass | mDa  | PPM  | DBE | i-FIT | Norm | Conf (%) | Formula    |
|----------|------------|------|------|-----|-------|------|----------|------------|
| 231.1380 | 231.1385   | -0.5 | -2.2 | 6.5 | 238.3 | n/a  | n/a      | C15 H19 O2 |

Figure S32. HRESIMS spectrum of (7Z, 9Z)-cannabiphenolic acid A (4).

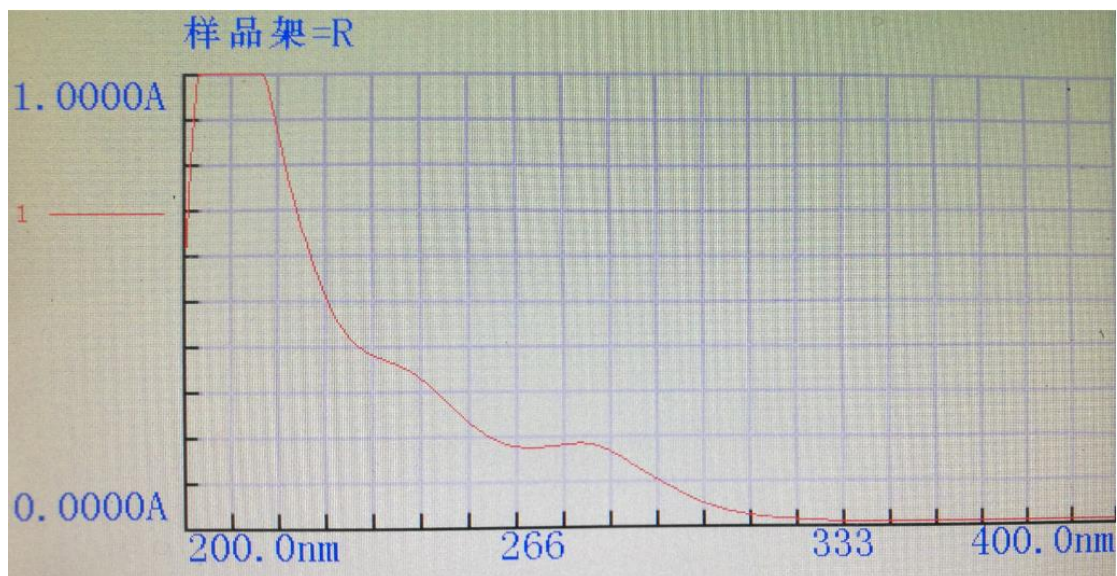

Figure S33. UV spectrum of (7Z, 9Z)-cannabiphenolic acid A (**4**).

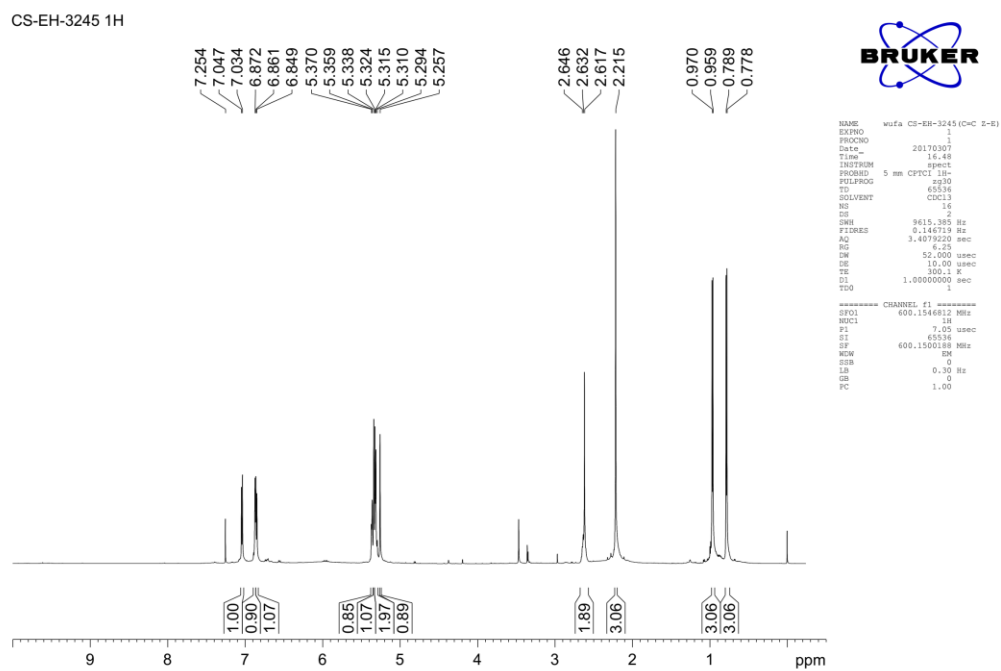

Figure S34.  $^1\text{H}$  NMR spectrum of (8S, 9Z)-cannabiphenolic acid B (**5**) in  $\text{CDCl}_3$ .

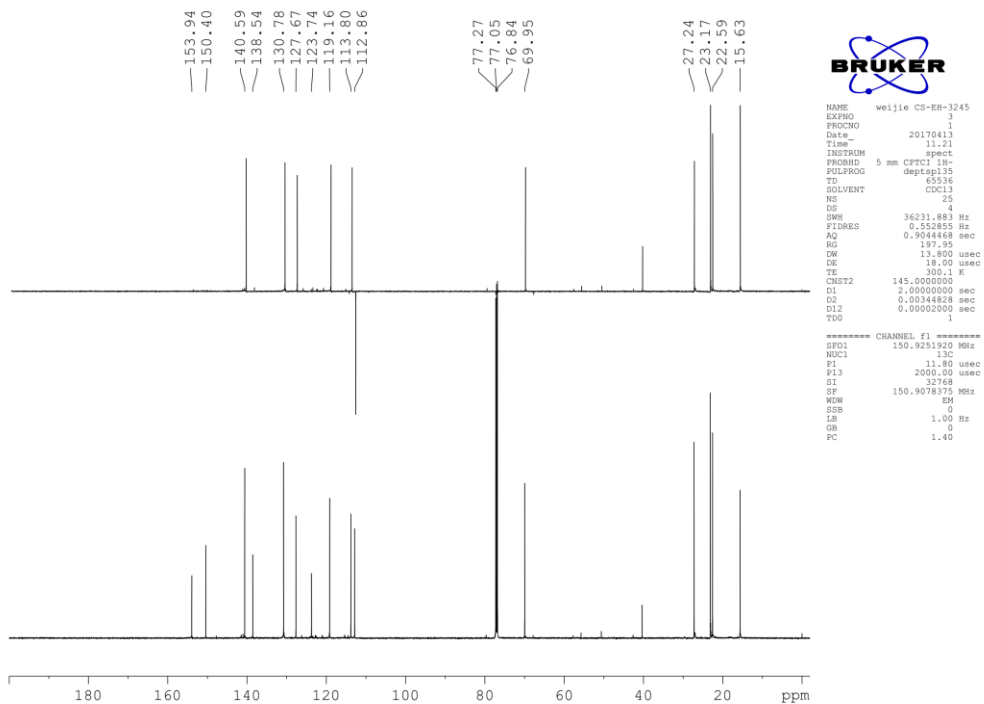

Figure S35.  $^{13}\text{C}$  NMR and DEPT 135 spectra of (8*S*, 9*Z*)-cannabiphenolic acid B (**5**) in  $\text{CDCl}_3$ .

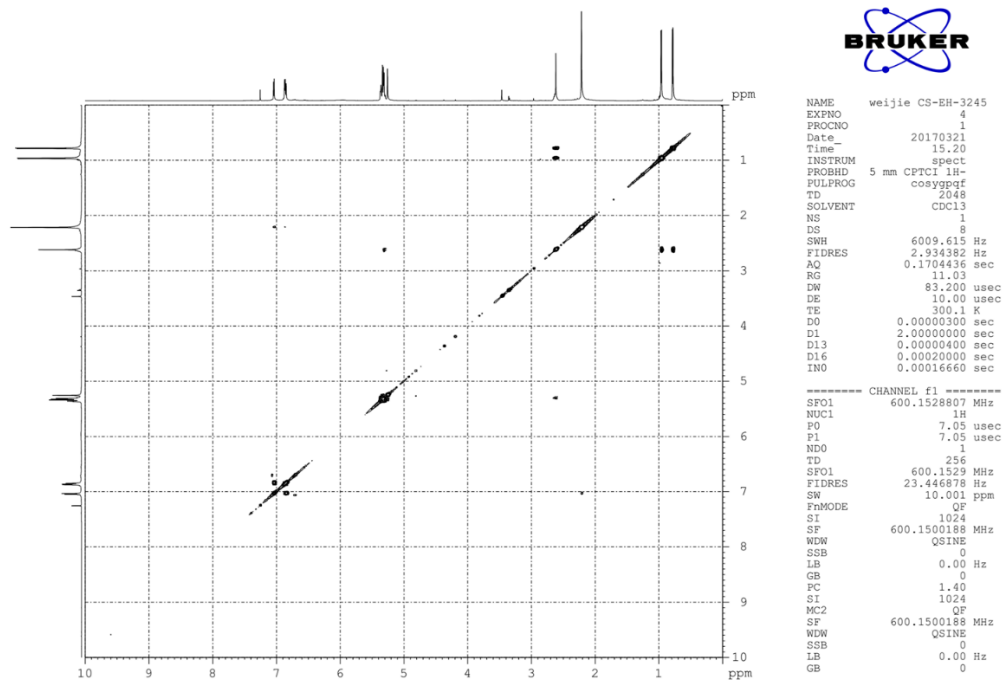

Figure S36.  $^1\text{H}$ - $^1\text{H}$  COSY spectrum of (8*S*, 9*Z*)-cannabiphenolic acid B (**5**) in  $\text{CDCl}_3$ .

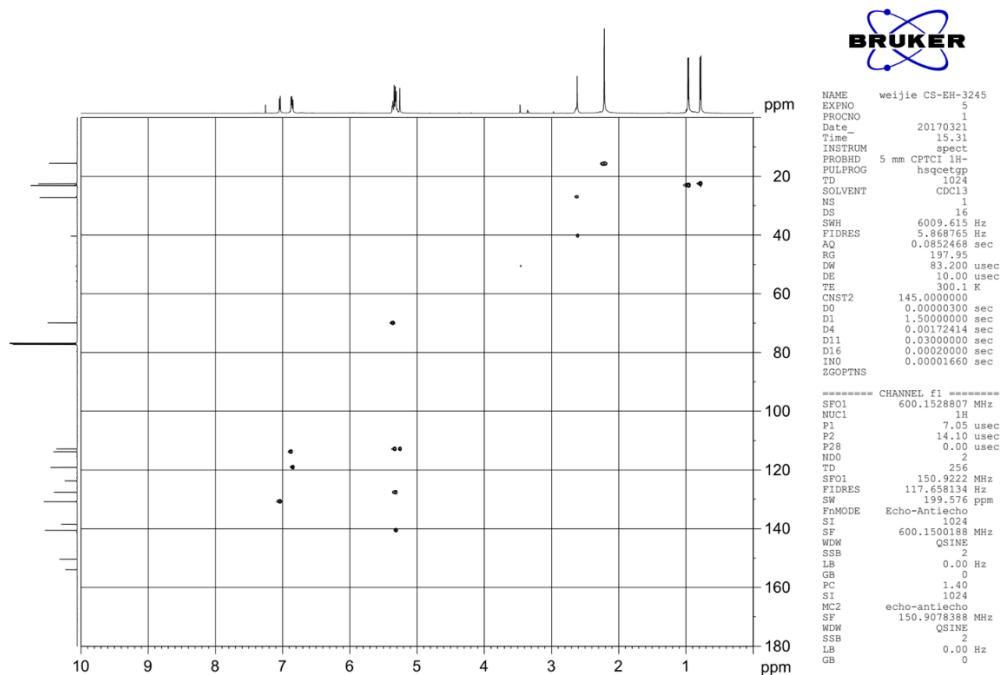

Figure S37. HSQC spectrum of (8*S*, 9*Z*)-cannabiphenolic acid B (**5**) in CDCl<sub>3</sub>.

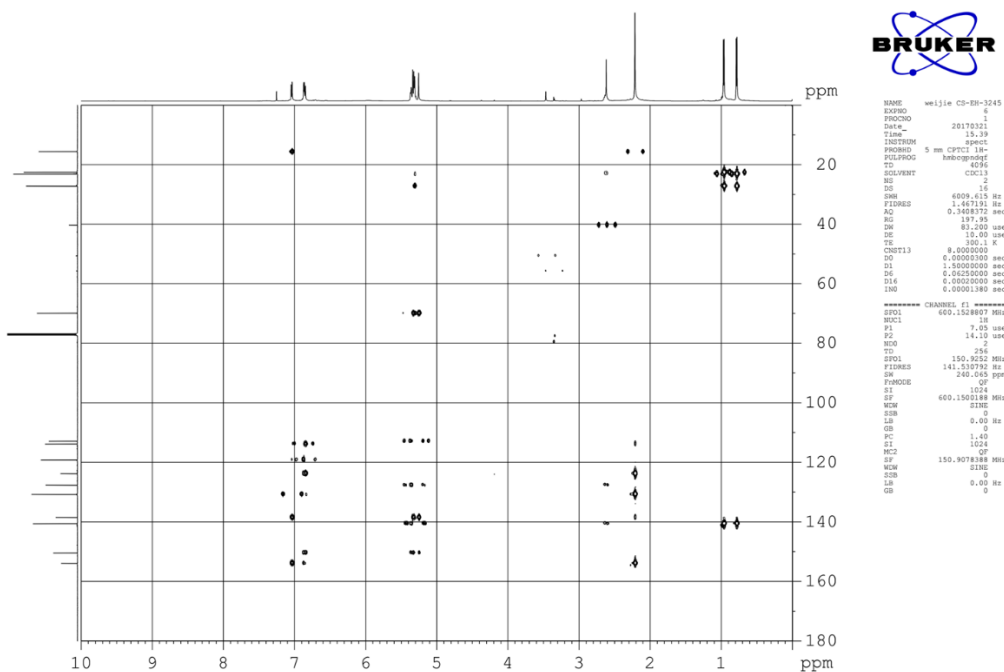

Figure S38. HMBC spectrum of (8*S*, 9*Z*)-cannabiphenolic acid B (**5**) in CDCl<sub>3</sub>.

Single Mass Analysis

Tolerance = 5.0 PPM / DBE: min = -1.5, max = 50.0

Element prediction: Off

Number of isotope peaks used for i-FIT = 3

Monoisotopic Mass, Even Electron Ions

101 formula(e) evaluated with 1 results within limits (up to 50 closest results for each mass)

Elements Used:

C: 15-15 H: 0-199 N: 0-1 O: 0-50 Na: 0-1 S: 0-1

CS-EH-3245

2017050348 193 (1.556)

1: TOF MS ES-  
4.07e+005

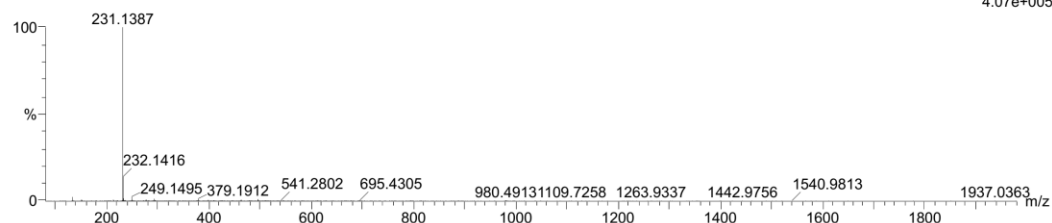

Minimum: -1.5  
Maximum: 50.0

| Mass     | Calc. Mass | mDa | PPM | DBE | i-FIT | Norm | Conf (%) | Formula    |
|----------|------------|-----|-----|-----|-------|------|----------|------------|
| 231.1387 | 231.1385   | 0.2 | 0.9 | 6.5 | 337.4 | n/a  | n/a      | C15 H19 O2 |

Figure S39. HRESIMS spectrum of (8*S*, 9*Z*)-cannabiphenolic acid B (5).

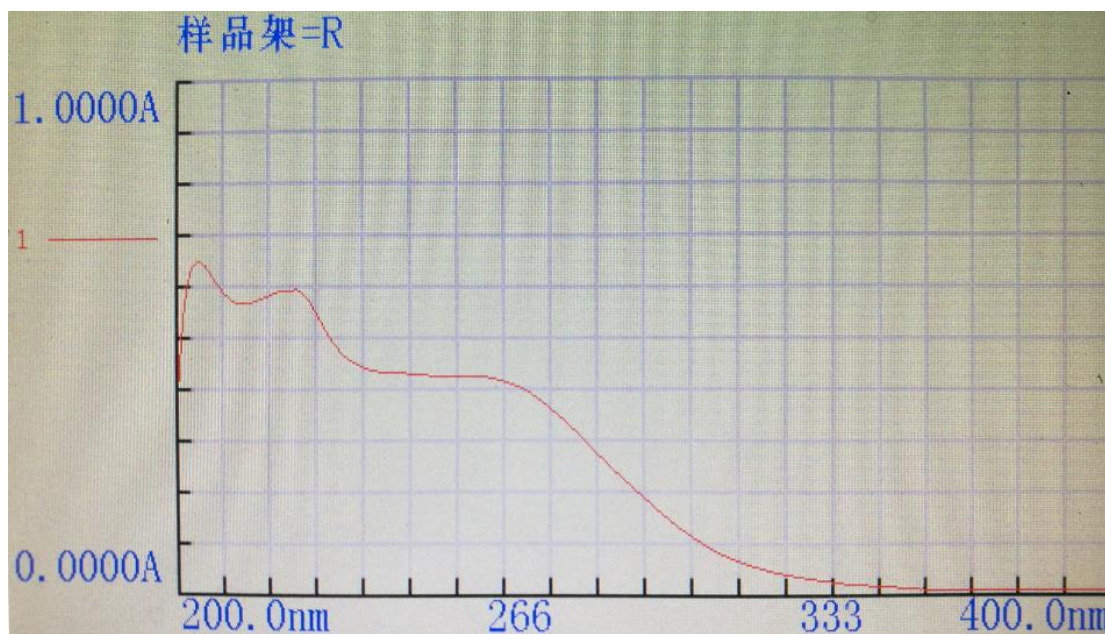

Figure S40. UV spectrum of (8*S*, 9*Z*)-cannabiphenolic acid B (5).



| Functional<br>mPW1PW91 |      | Solvent?<br>PCM |           | Basis Set<br>6-311+G(d,p) |          | Type of Data<br>Unscaled Shifts |          |
|------------------------|------|-----------------|-----------|---------------------------|----------|---------------------------------|----------|
|                        |      | DP4+            | 0.00%     | 100.00%                   | -        | -                               | -        |
| Nuclei                 | sp2? | Experiment      | Isomer 1  | Isomer 2                  | Isomer 3 | Isomer 4                        | Isomer 5 |
| C                      |      | 15.5344         | 18.66921  | 18.64712                  |          |                                 |          |
| C                      | x    | 123.1251        | 130.8866  | 131.57709                 |          |                                 |          |
| C                      | x    | 153.6654        | 164.20831 | 163.5768                  |          |                                 |          |
| C                      | x    | 115.4674        | 116.92795 | 120.40864                 |          |                                 |          |
| C                      | x    | 137.0233        | 150.20307 | 146.2386                  |          |                                 |          |
| C                      | x    | 140.5277        | 149.07616 | 152.03422                 |          |                                 |          |
| C                      |      | 67.9152         | 64.42602  | 74.71416                  |          |                                 |          |
| C                      | x    | 122.3789        | 132.17665 | 130.53072                 |          |                                 |          |
| C                      | x    | 122.6142        | 128.25533 | 130.47206                 |          |                                 |          |
| C                      | x    | 141.5551        | 153.91382 | 152.83204                 |          |                                 |          |
| C                      |      | 27.0115         | 34.46574  | 34.66421                  |          |                                 |          |
| C                      |      | 23.0881         | 25.20402  | 25.20637                  |          |                                 |          |
| C                      |      | 23.0881         | 24.9941   | 25.17819                  |          |                                 |          |
| C                      | x    | 121.3131        | 124.09433 | 127.20956                 |          |                                 |          |
| C                      | x    | 130.9557        | 137.42589 | 137.22484                 |          |                                 |          |
| H                      |      | 2.2514          | 2.42538   | 2.44689                   |          |                                 |          |
| H                      |      | 2.2514          | 2.41829   | 2.44163                   |          |                                 |          |
| H                      |      | 2.2514          | 2.10521   | 2.13054                   |          |                                 |          |
| H                      | x    | 6.705           | 7.29012   | 7.03457                   |          |                                 |          |
| H                      |      | 4.3997          | 4.47124   | 4.65955                   |          |                                 |          |
| H                      |      | 4.3997          | 5.08463   | 4.46226                   |          |                                 |          |
| H                      | x    | 6.58275         | 7.16738   | 6.97964                   |          |                                 |          |
| H                      | x    | 5.9486          | 6.73015   | 6.48497                   |          |                                 |          |
| H                      | x    | 5.2775          | 5.78576   | 5.64706                   |          |                                 |          |
| H                      |      | 2.8773          | 3.1381    | 3.08682                   |          |                                 |          |
| H                      |      | 0.9977          | 1.06429   | 1.04998                   |          |                                 |          |
| H                      |      | 0.9977          | 1.25974   | 1.23863                   |          |                                 |          |
| H                      |      | 0.9977          | 0.93798   | 0.91876                   |          |                                 |          |
| H                      |      | 1.0087          | 1.22845   | 1.21345                   |          |                                 |          |
| H                      |      | 1.0087          | 1.00984   | 1.00926                   |          |                                 |          |
| H                      |      | 1.0087          | 0.90695   | 0.88608                   |          |                                 |          |
| H                      | x    | 6.75745         | 7.293     | 7.07616                   |          |                                 |          |
| H                      | x    | 7.1087          | 7.3652    | 7.38118                   |          |                                 |          |

Figure S41. Results of DP4+ analysis of (7Z, 9Z)-cannabiphenolic acid A (4).



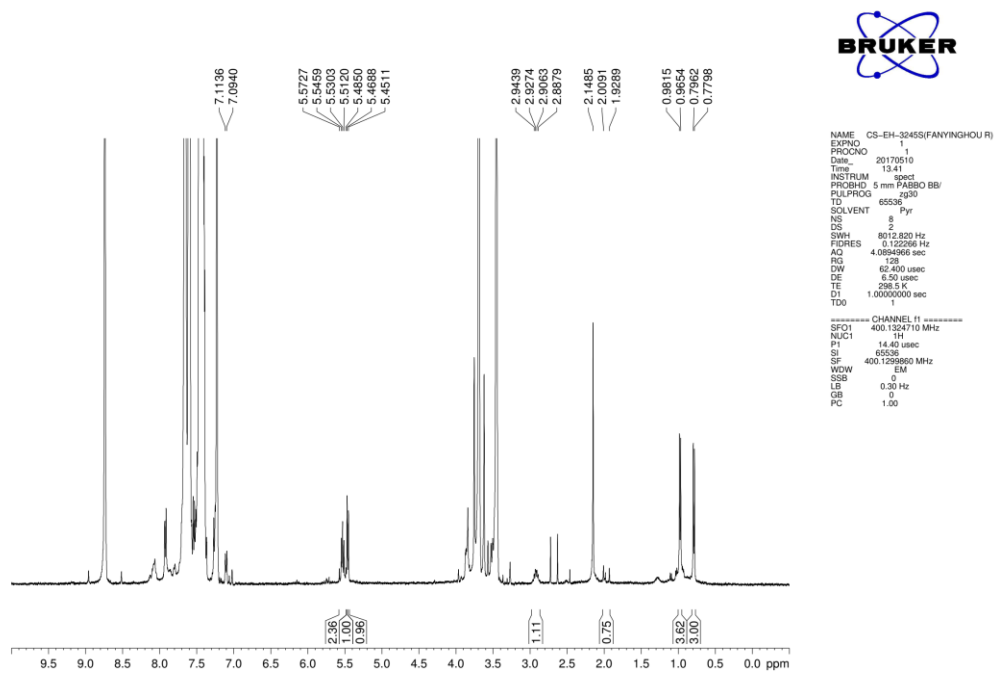

Figure S42.  $^1\text{H-NMR}$  spectrum of (*R*)-AT Ester of (*8S*, *9Z*)-cannabiphenolic acid B (**5**) in pyridine- $d_5$ .

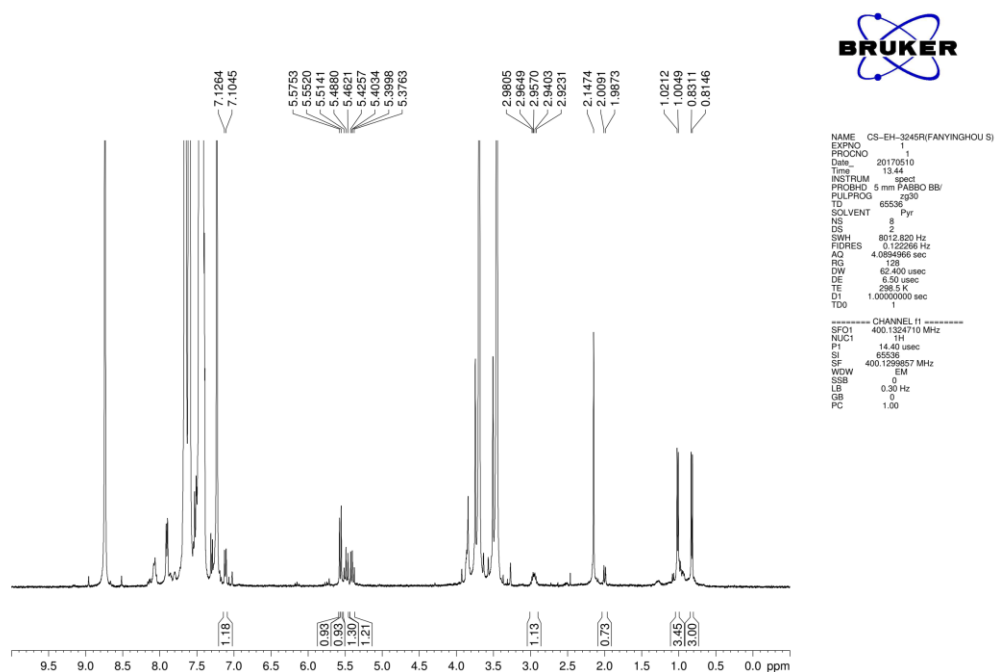

Figure S43.  $^1\text{H-NMR}$  spectrum of (*S*)-AT Ester of (*8S*, *9Z*)-cannabiphenolic acid B (**5**) in pyridine- $d_5$ .

Table S1. Effects of compounds **1-5**, **7**, **8** and **12-16** against H<sub>2</sub>O<sub>2</sub>-induced cytotoxicity in PC 12 cells

| Compound  | Compound concentration (μM) | Cell viability of compound group (%) <sup>a</sup> | Cell viability of H <sub>2</sub> O <sub>2</sub> + compound group (%) <sup>a</sup> | Rescue effect of compound (%) <sup>b</sup> |
|-----------|-----------------------------|---------------------------------------------------|-----------------------------------------------------------------------------------|--------------------------------------------|
| <b>1</b>  | 1                           | 94.51 ± 1.26                                      | 77.26 ± 0.98                                                                      | 12.61                                      |
|           | 10                          | 118.36 ± 0.57                                     | 77.96 ± 1.05                                                                      | 13.63                                      |
|           | 50                          | 124.53 ± 0.95                                     | 72.71 ± 0.08                                                                      | 5.98                                       |
| <b>2</b>  | 1                           | 110.66 ± 0.09                                     | 74.72 ± 1.09                                                                      | 8.91                                       |
|           | 10                          | 107.10 ± 0.37                                     | 75.67 ± 0.83                                                                      | 10.29                                      |
|           | 50                          | 115.32 ± 0.85                                     | 75.09 ± 1.34                                                                      | 9.44                                       |
| <b>3</b>  | 1                           | 121.55 ± 0.48                                     | 71.99 ± 1.03                                                                      | 4.05                                       |
|           | 10                          | 118.46 ± 0.83                                     | 84.54 ± 1.30                                                                      | 22.19                                      |
|           | 50                          | 97.11 ± 0.28                                      | 75.44 ± 1.10                                                                      | 9.03                                       |
| <b>4</b>  | 1                           | 99.76 ± 1.31                                      | 84.19 ± 1.49                                                                      | 22.71                                      |
|           | 10                          | 103.04 ± 0.57                                     | 80.90 ± 1.49                                                                      | 17.91                                      |
|           | 50                          | 120.25 ± 1.02                                     | 66.43 ± 0.05                                                                      | -3.31                                      |
| <b>5</b>  | 1                           | 120.82 ± 0.94                                     | 70.36 ± 0.75                                                                      | 1.69                                       |
|           | 10                          | 99.06 ± 0.16                                      | 68.08 ± 1.05                                                                      | -1.60                                      |
|           | 50                          | 94.24 ± 0.59                                      | 54.80 ± 0.41                                                                      | -20.80                                     |
| <b>7</b>  | 0                           | 100.00 ± 0.03                                     | 48.87 ± 0.03                                                                      |                                            |
|           | 3.125                       | 96.44 ± 0.04                                      | 44.44 ± 0.02                                                                      | -9.07                                      |
|           | 6.25                        | 96.71 ± 0.06                                      | 40.96 ± 0.04                                                                      | -16.20                                     |
|           | 12.5                        | 93.87 ± 0.03                                      | 34.80 ± 0.01                                                                      | -28.80                                     |
| <b>8</b>  | 0                           | 100.00 ± 0.02                                     | 48.93 ± 0.04                                                                      |                                            |
|           | 3.125                       | 98.66 ± 0.02                                      | 44.46 ± 0.25                                                                      | -9.13                                      |
|           | 6.25                        | 91.60 ± 0.03                                      | 27.95 ± 0.05                                                                      | -42.87                                     |
|           | 12.5                        | 89.17 ± 0.01                                      | 42.48 ± 0.49                                                                      | -13.17                                     |
| <b>12</b> | 0                           | 100.00 ± 0.03                                     | 48.87 ± 0.03                                                                      |                                            |
|           | 6.25                        | 98.11 ± 0.02                                      | 61.16 ± 0.04                                                                      | 25.15                                      |
|           | 12.5                        | 99.62 ± 0.02                                      | 63.94 ± 0.04                                                                      | 30.83                                      |
|           | 25                          | 101.85 ± 0.04                                     | 59.50 ± 0.03                                                                      | 21.74                                      |
|           | 50                          | 98.41 ± 0.03                                      | 53.78 ± 0.02                                                                      | 10.05                                      |
| <b>13</b> | 0                           | 100.00 ± 0.04                                     | 48.87 ± 0.03                                                                      |                                            |
|           | 12.5                        | 102.59 ± 0.07                                     | 57.63 ± 0.05                                                                      | 17.92                                      |
|           | 25                          | 97.39 ± 0.01                                      | 58.71 ± 0.02                                                                      | 20.13                                      |
|           | 50                          | 93.30 ± 0.03                                      | 58.09 ± 0.02                                                                      | 18.85                                      |
|           | 100                         | 92.04 ± 0.01                                      | 58.57 ± 0.01                                                                      | 19.83                                      |
| <b>14</b> | 0                           | 100.00 ± 0.04                                     | 48.93 ± 0.04                                                                      |                                            |
|           | 12.5                        | 96.54 ± 0.03                                      | 57.93 ± 0.03                                                                      | 18.39                                      |
|           | 25                          | 95.32 ± 0.03                                      | 60.22 ± 0.07                                                                      | 23.07                                      |
|           | 50                          | 94.54 ± 0.03                                      | 54.50 ± 0.05                                                                      | 11.38                                      |
|           | 100                         | 102.00 ± 0.01                                     | 51.90 ± 0.04                                                                      | 6.07                                       |
| <b>15</b> | 0                           | 100.00 ± 0.02                                     | 48.93 ± 0.04                                                                      |                                            |
|           | 3.125                       | 100.26 ± 0.01                                     | 51.32 ± 0.05                                                                      | 4.88                                       |
|           | 6.25                        | 92.86 ± 0.02                                      | 54.50 ± 0.04                                                                      | 11.39                                      |
|           | 12.5                        | 92.09 ± 0.01                                      | 57.78 ± 0.04                                                                      | 18.08                                      |
| <b>16</b> | 0                           | 100.00 ± 0.02                                     | 51.50 ± 0.06                                                                      |                                            |
|           | 3.125                       | 97.14 ± 0.02                                      | 45.45 ± 0.05                                                                      | -11.74                                     |
|           | 6.25                        | 98.09 ± 0.02                                      | 48.12 ± 0.05                                                                      | -6.57                                      |
|           | 12.5                        | 93.54 ± 0.02                                      | 46.50 ± 0.31                                                                      | -9.70                                      |

<sup>a</sup> The cell viabilities are presented as mean ± SD, which are determined by at least three independent experiments.

<sup>b</sup> Rescue rate = [(cell viability)<sub>H<sub>2</sub>O<sub>2</sub> + compound</sub> - (cell viability)<sub>H<sub>2</sub>O<sub>2</sub>}] / [(cell viability)<sub>H<sub>2</sub>O<sub>2</sub>}] × 100%</sub></sub>
